# Supplementary material for: Synthesis of α-enamino esters via Cu(ii)-promoted dehydrogenation of α-amino acid esters: application to the synthesis of polysubstituted pyrroles
Source: Royal Society of Chemistry journal article supplement (doi:10.1039/c5qo00182j), 2015-01-01

## Supporting information

# Synthesis of $\alpha$ -Enamino Esters via Cu(II)-promoted Dehydrogenation of $\alpha$ -Amino Acid Esters: Application to Synthesis of Polysubstituted Pyrroles

Nini **Zhou**, Zhongle **Li**, Zhixiang **Xie**\*

State Key Laboratory of Applied Organic Chemistry, College of Chemistry and  
Chemical Engineering, Lanzhou University, Lanzhou, 730000, P. R. China

### Table of Contents

|   |                                                                                     |         |
|---|-------------------------------------------------------------------------------------|---------|
| 1 | $^1\text{H}$ NMR and $^{13}\text{C}$ NMR Spectra for $\alpha$ -enamino esters 2a-2q | S2-S18  |
| 2 | $^1\text{H}$ NMR and $^{13}\text{C}$ NMR Spectra for pyrroles 3a-3n                 | S19-S32 |
| 3 | $^1\text{H}$ NMR and $^{13}\text{C}$ NMR Spectra 4a                                 | S33     |
| 4 | $^1\text{H}$ NMR and $^{13}\text{C}$ NMR Spectra 4b                                 | S34     |

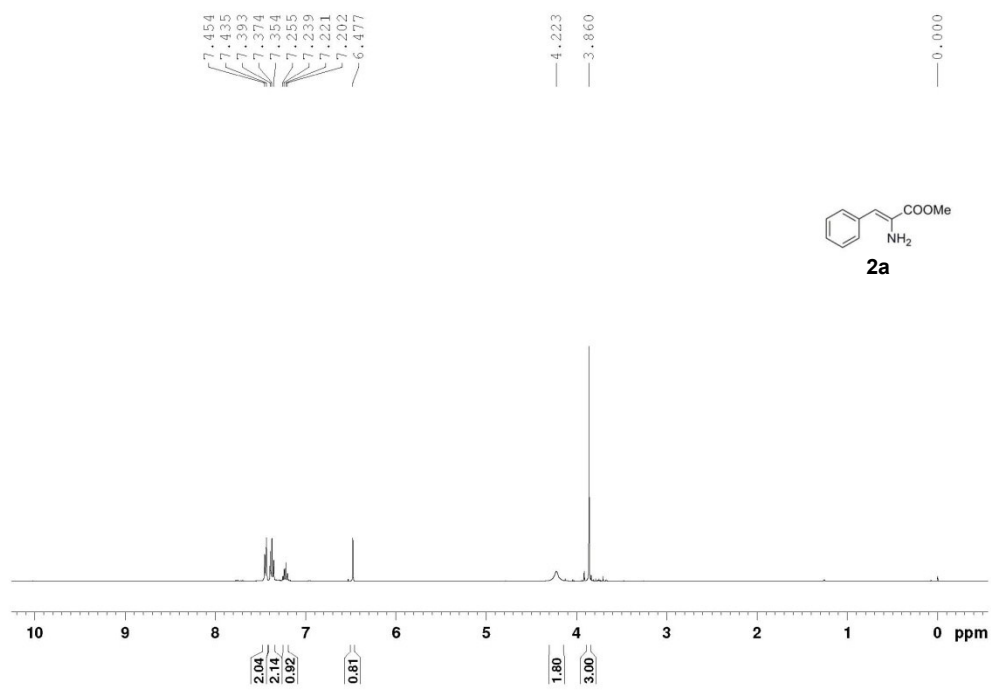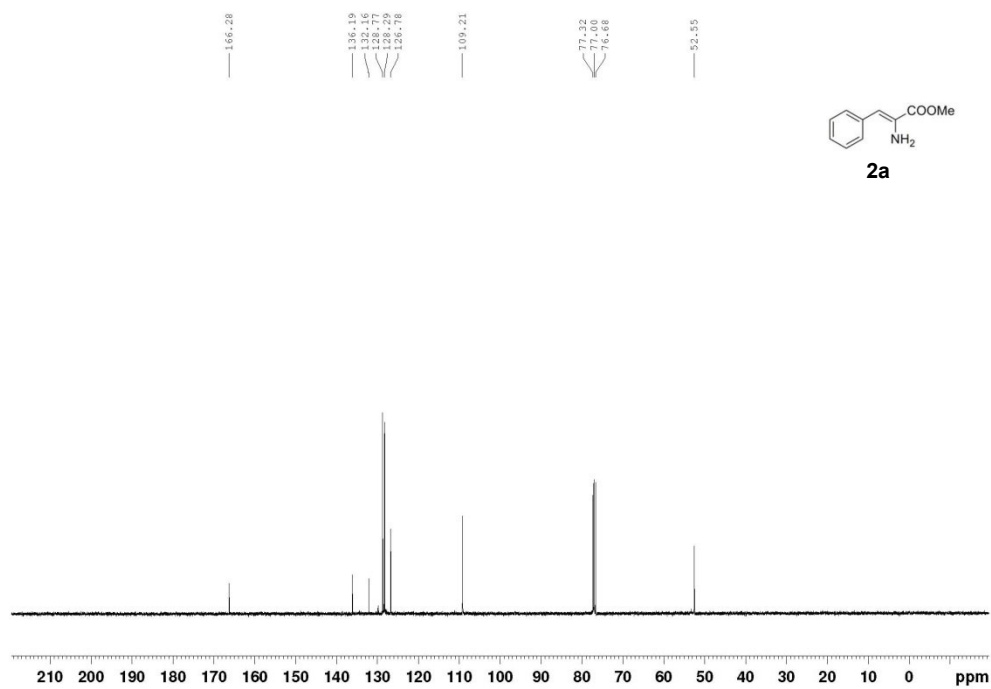

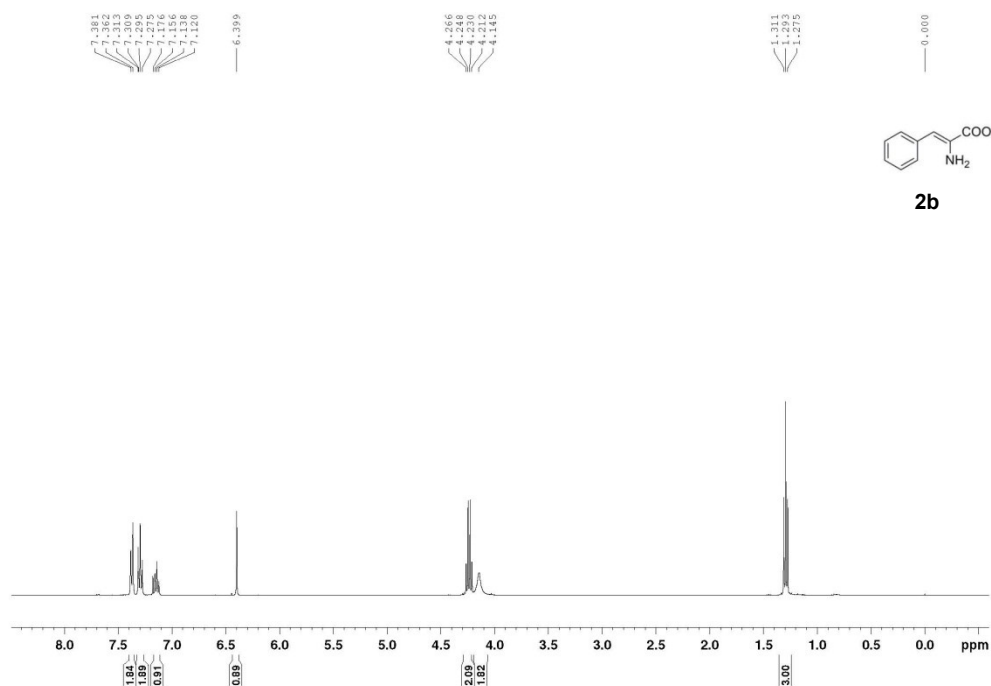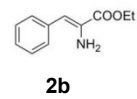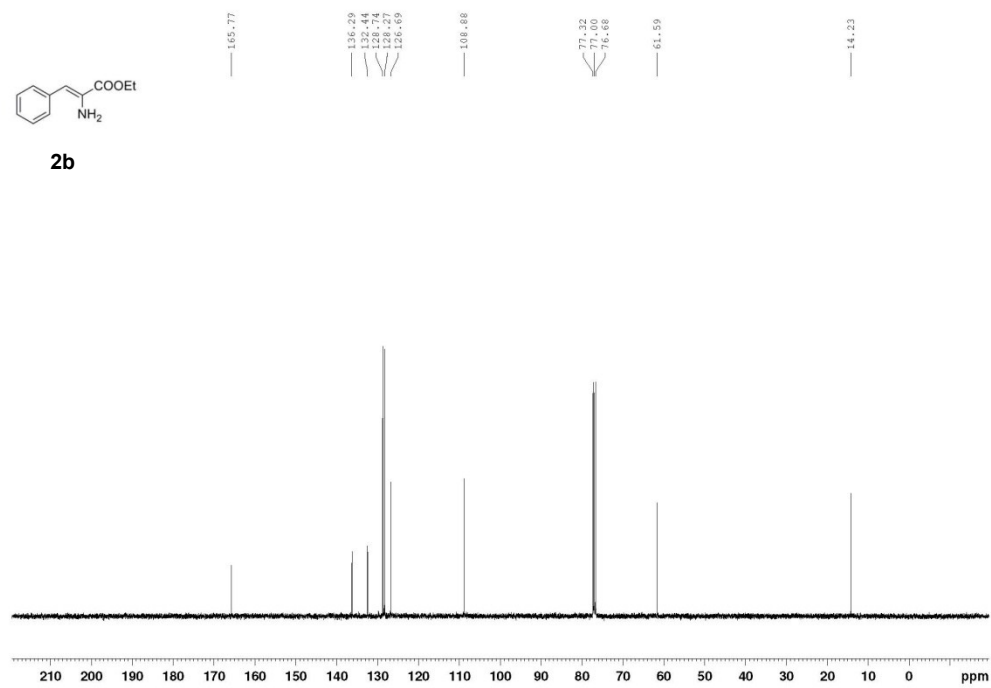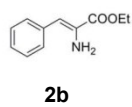

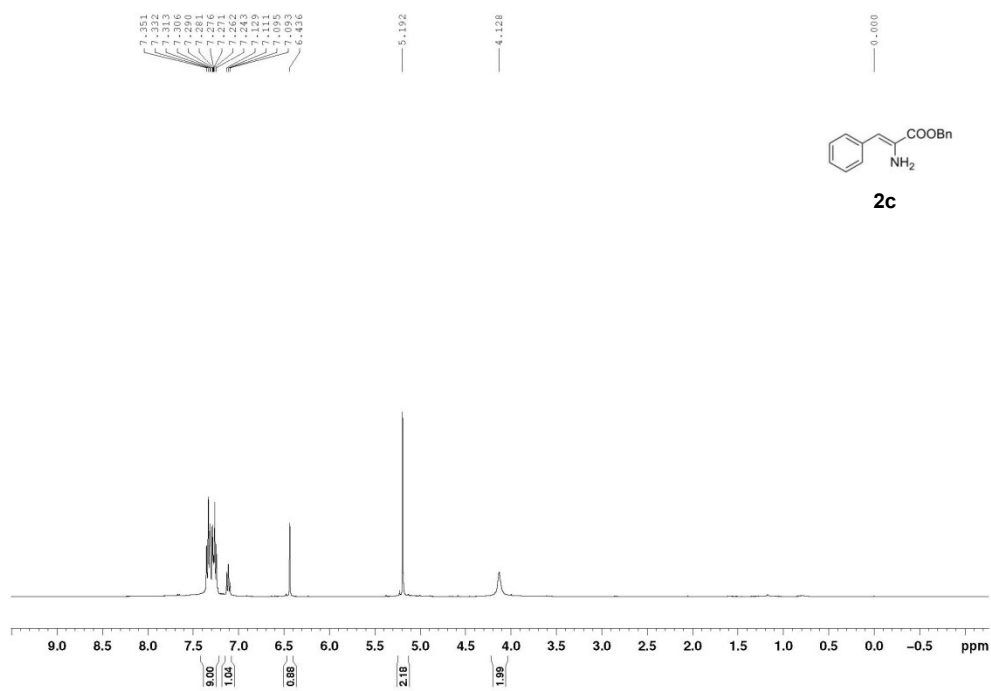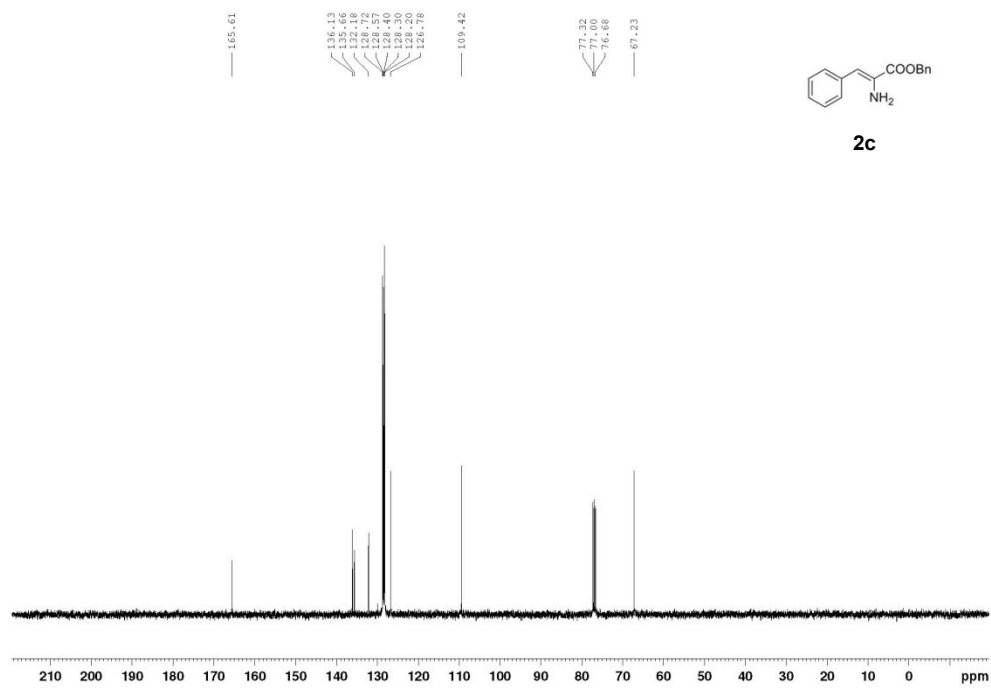

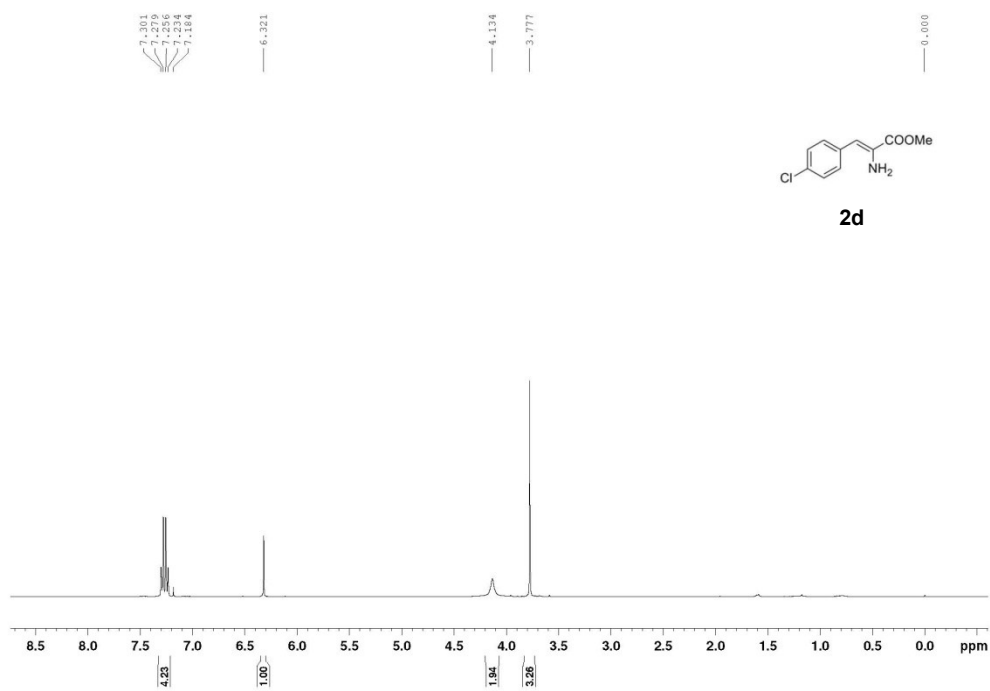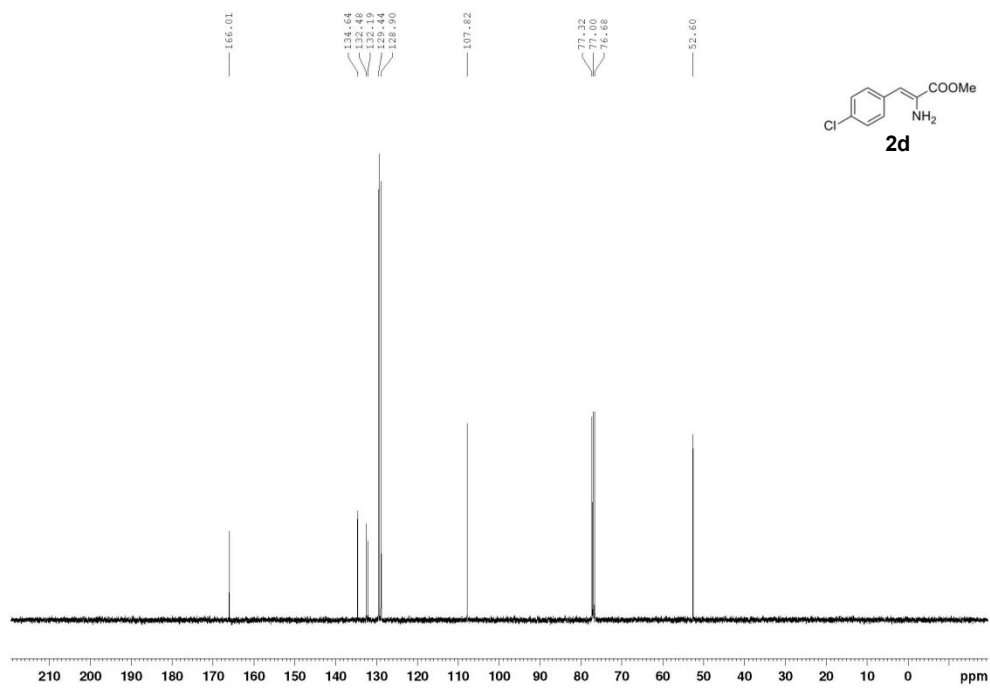

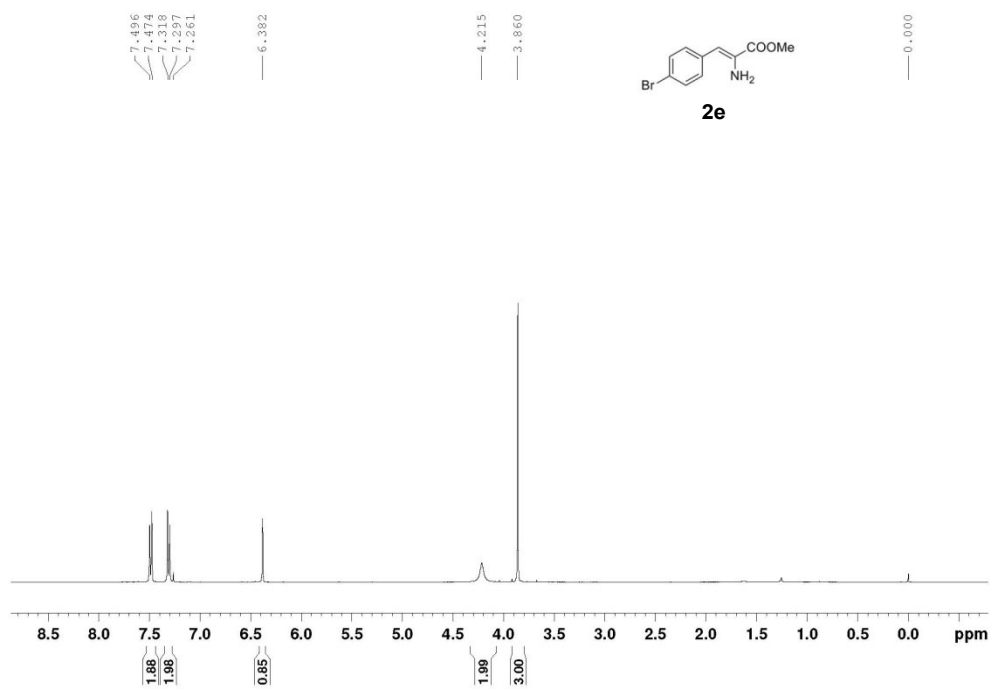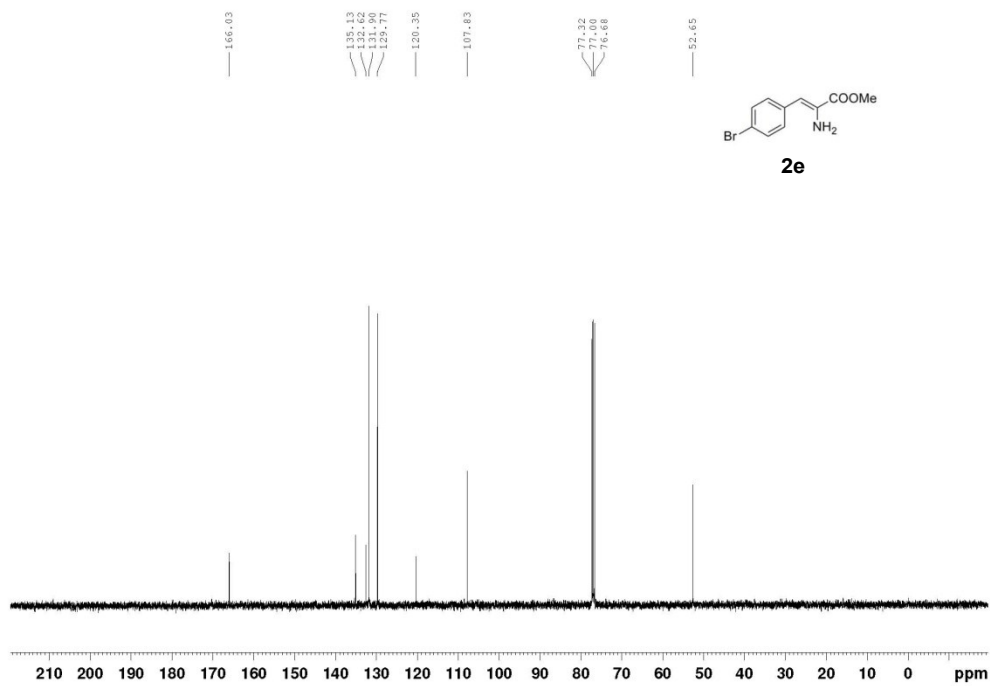

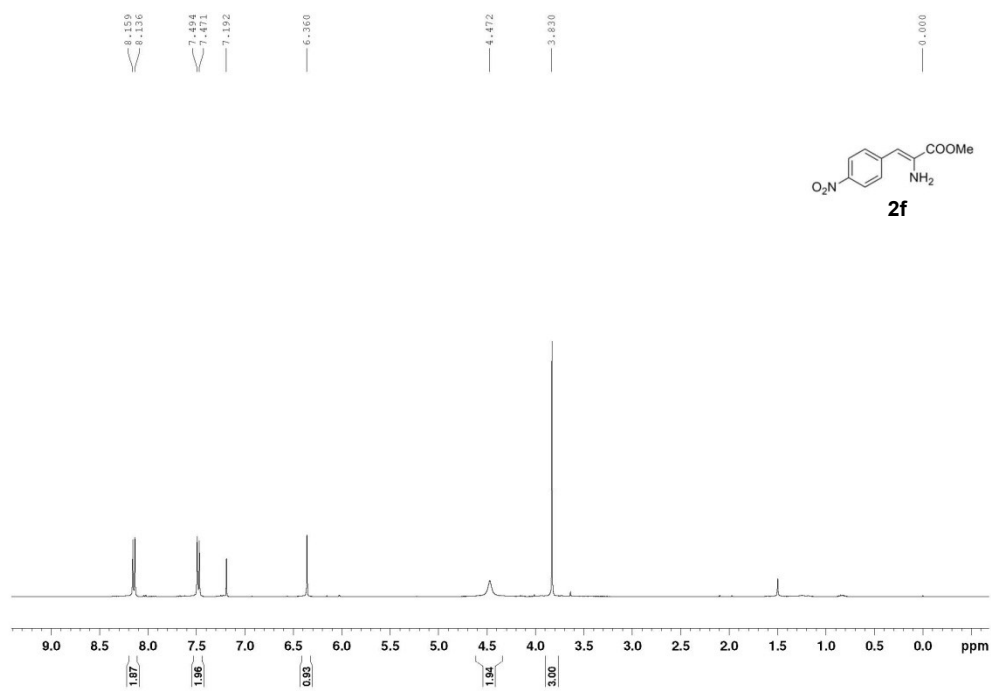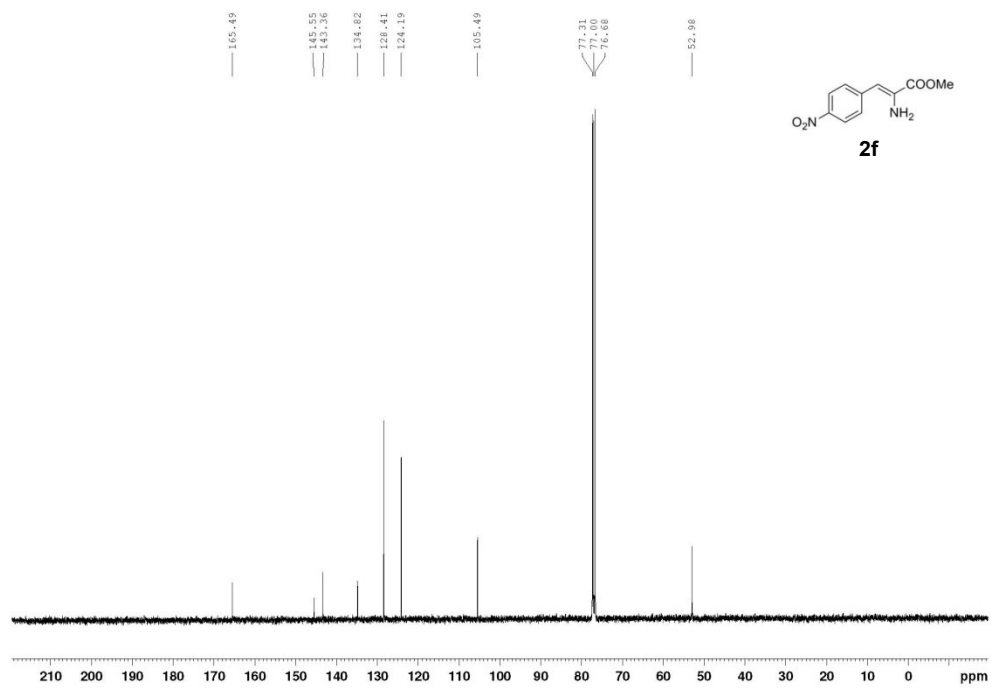

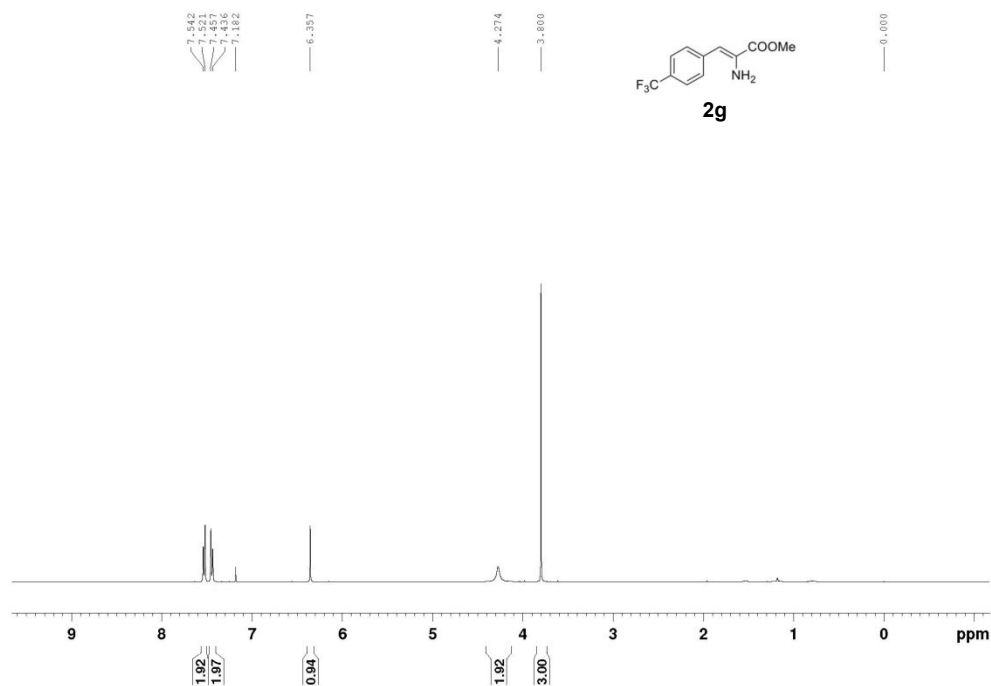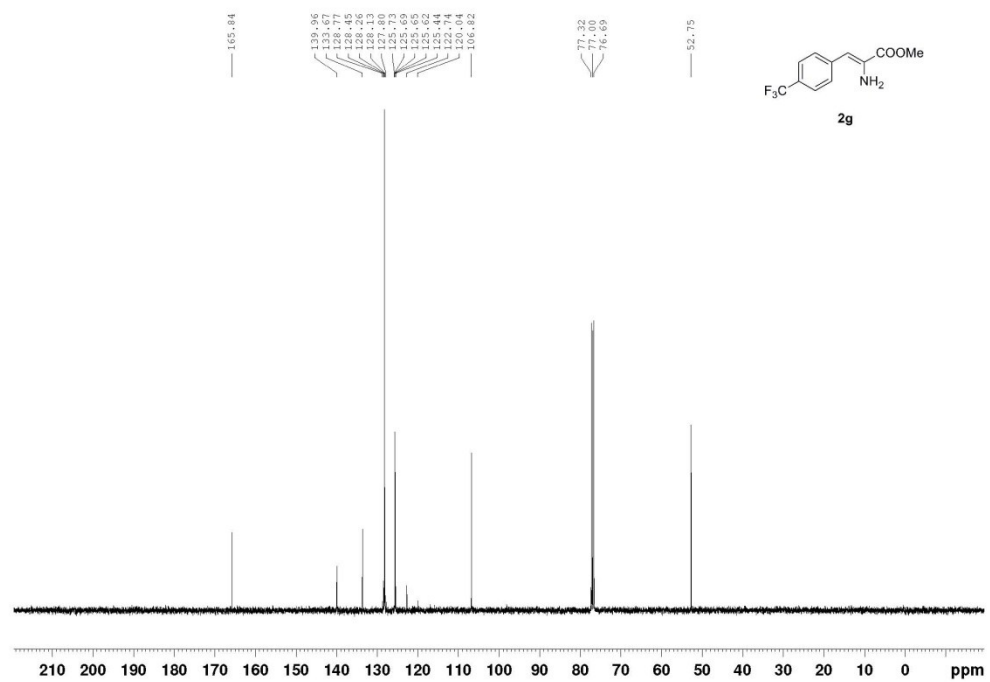



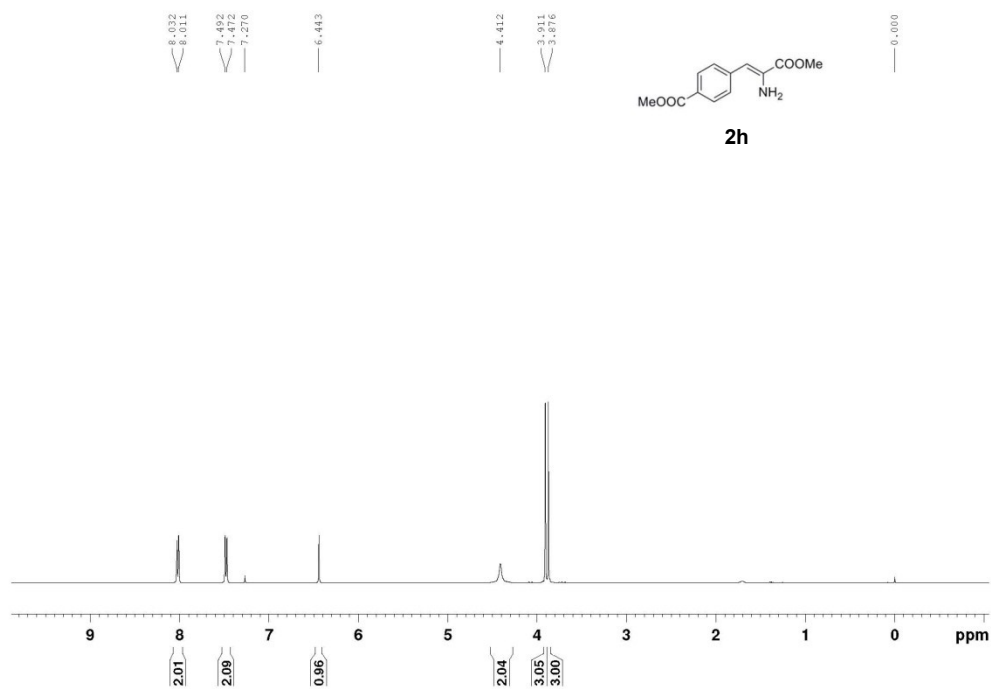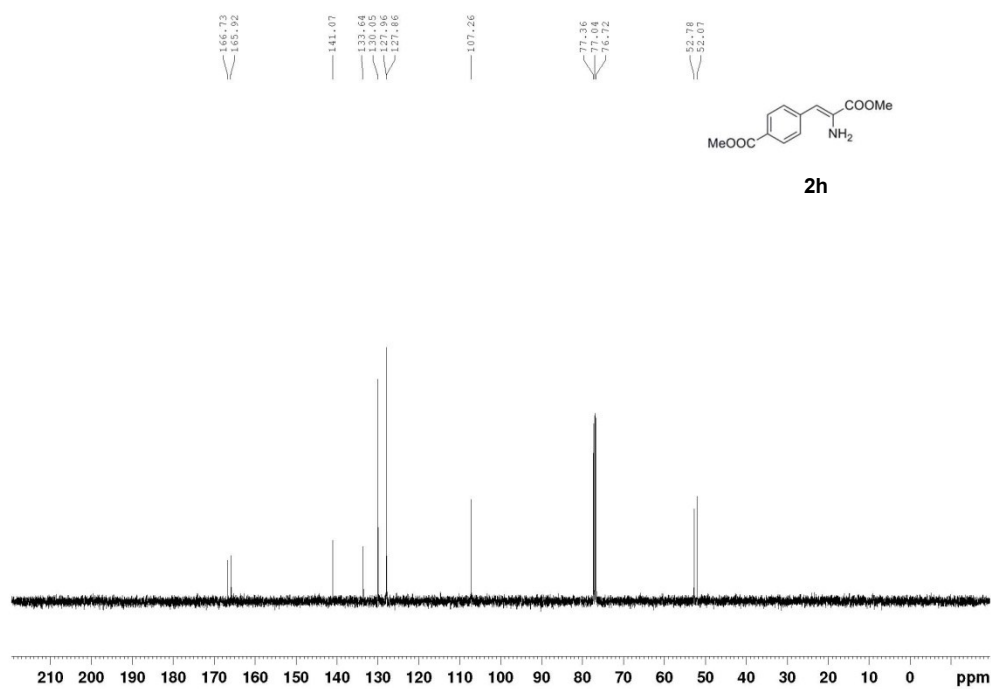

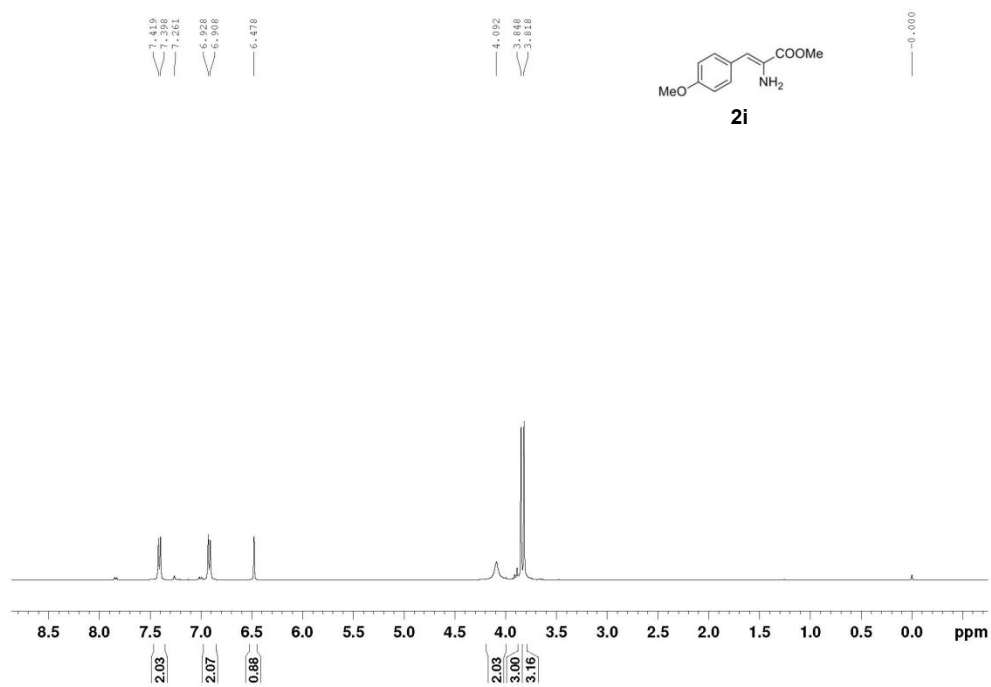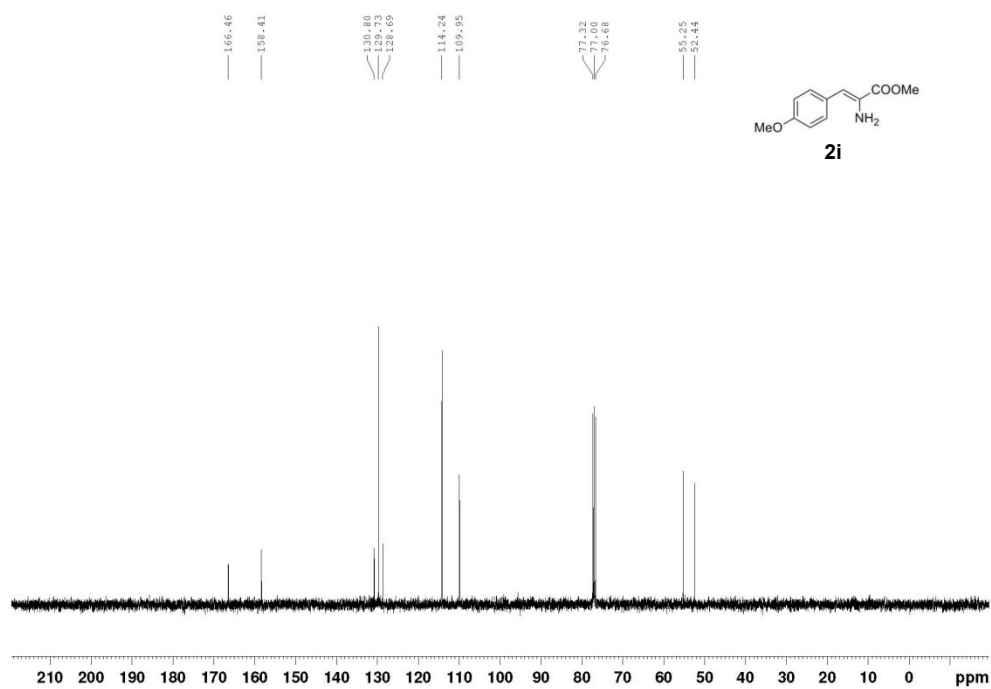

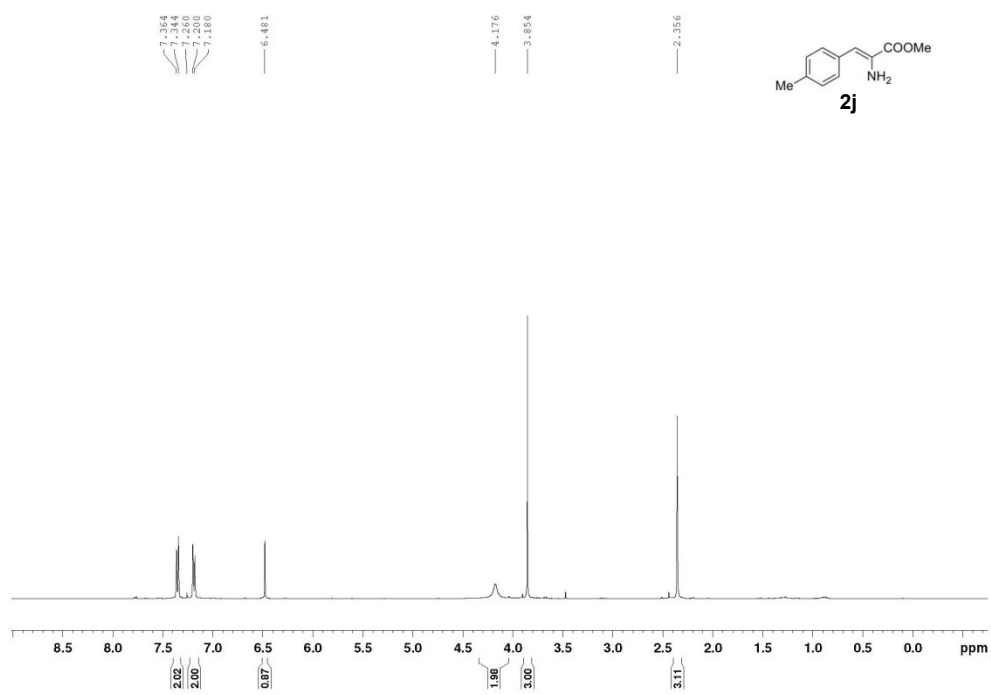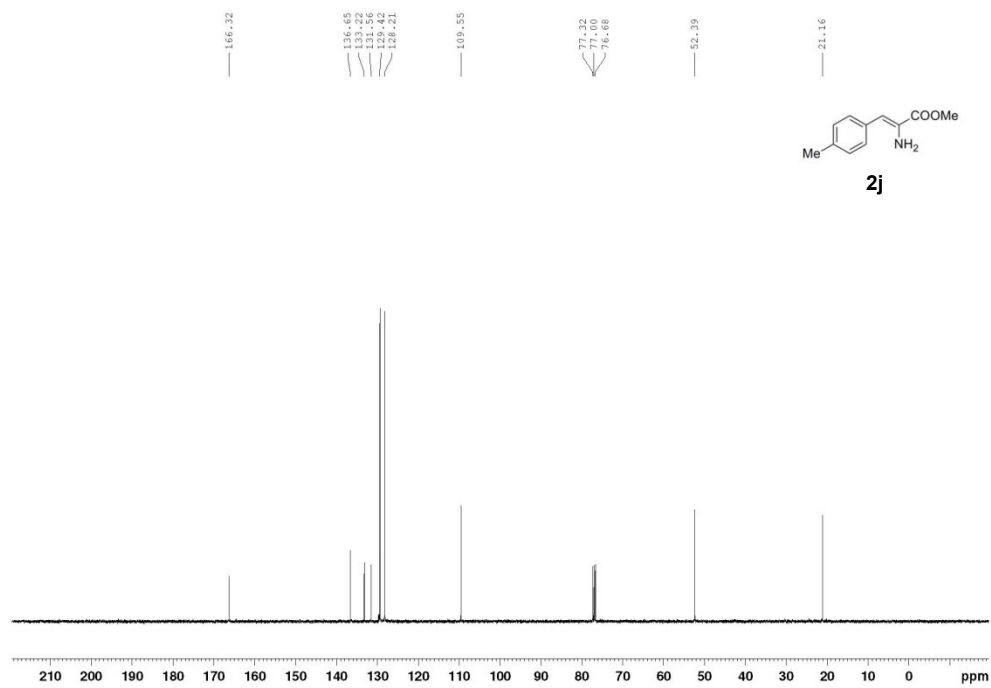

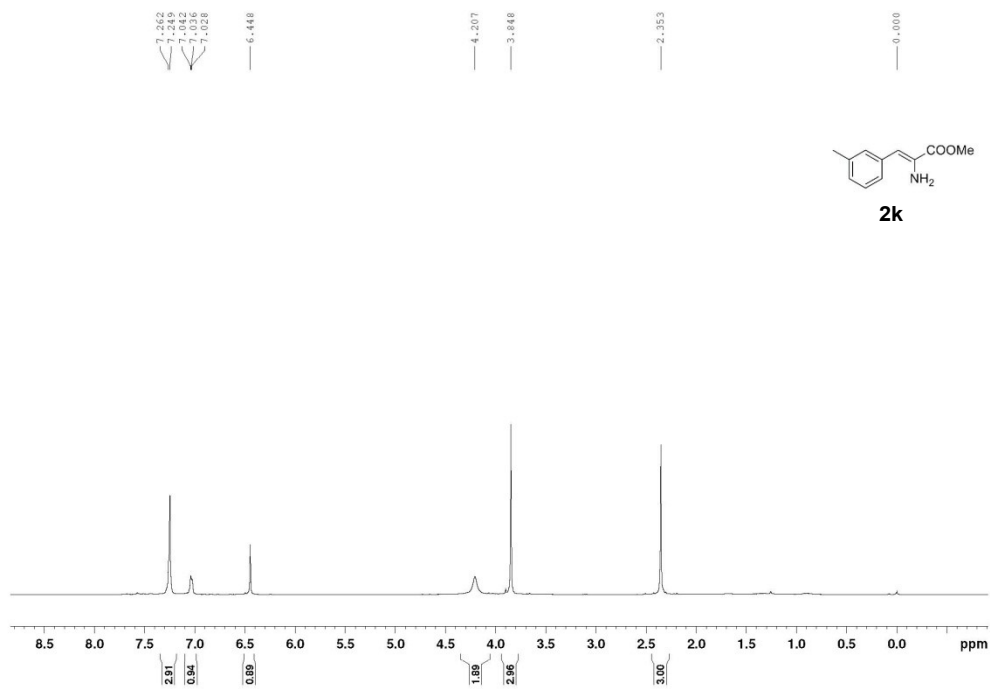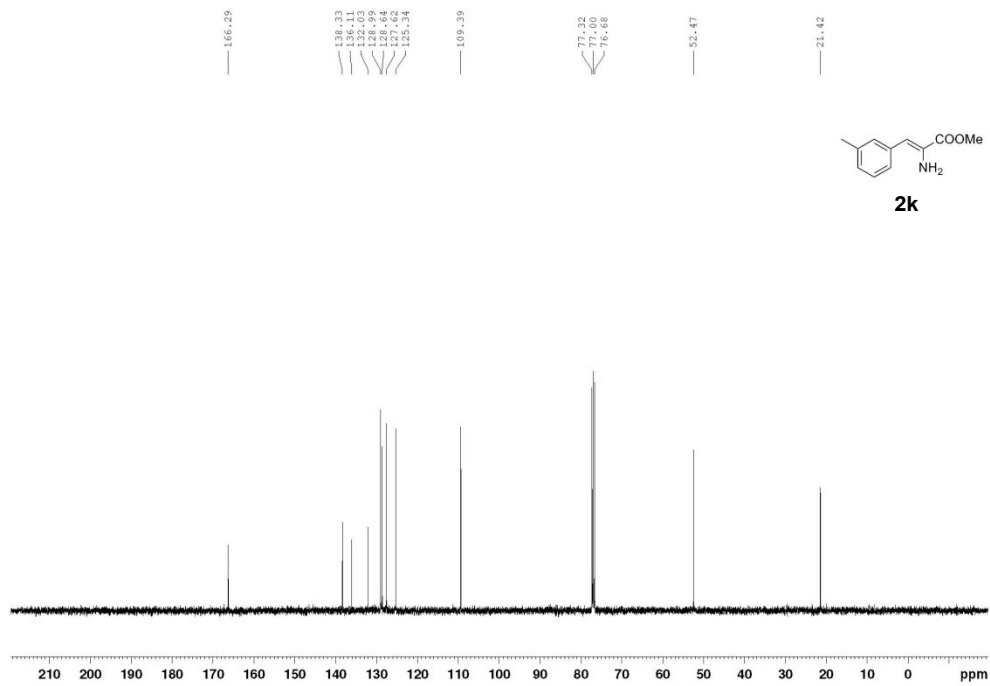

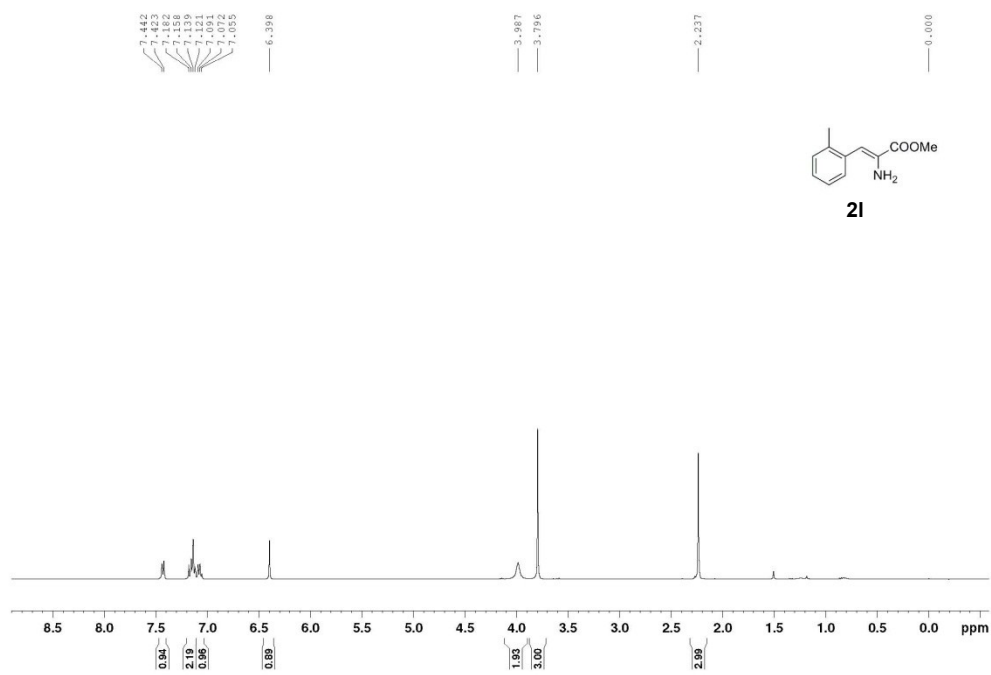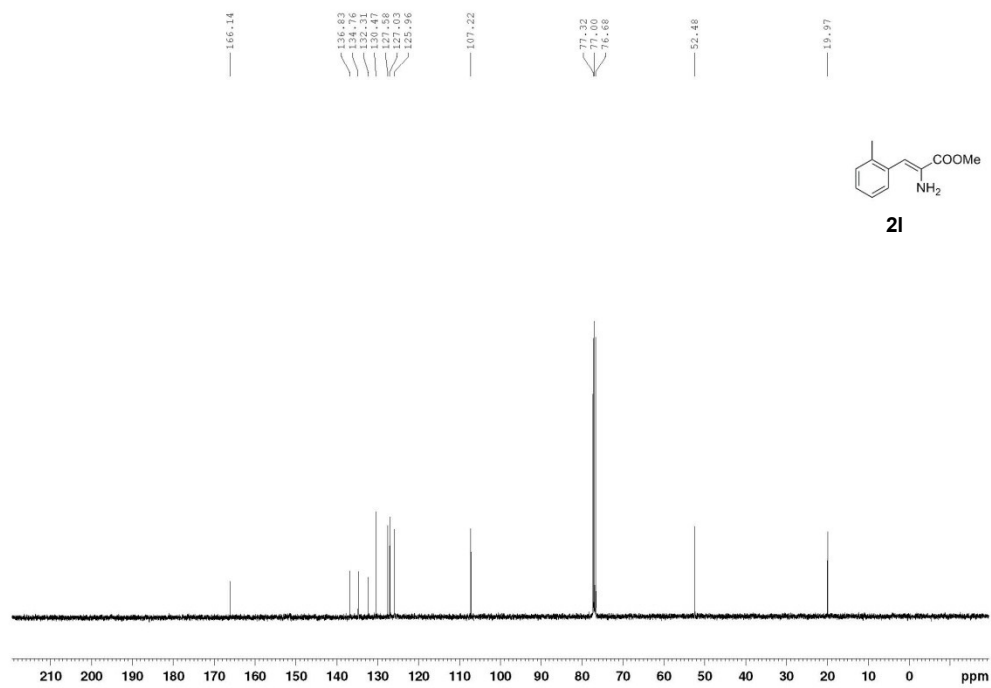

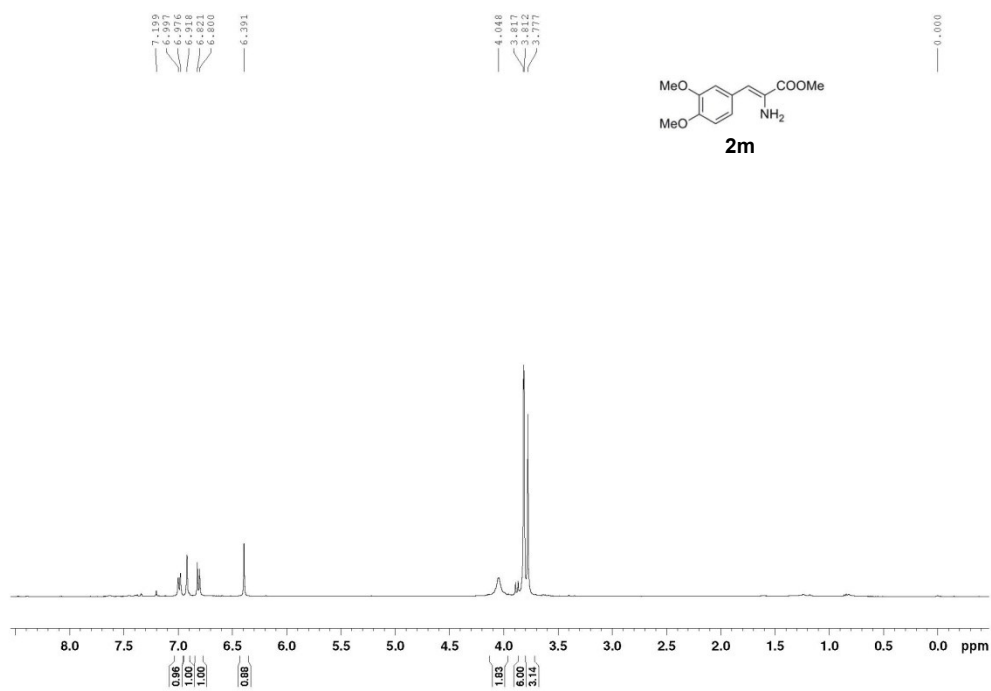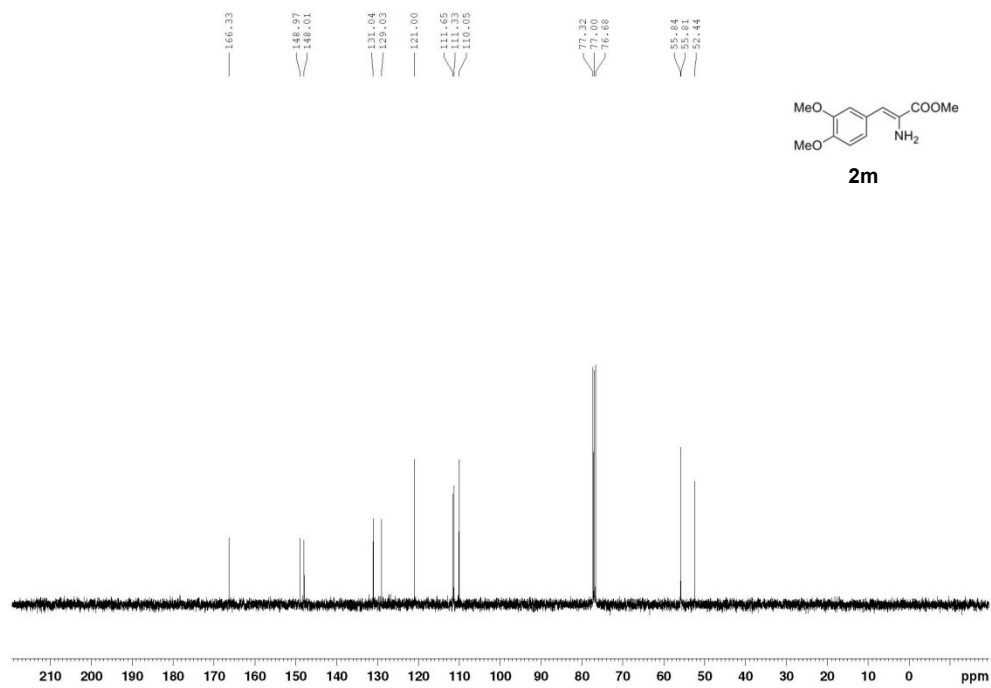

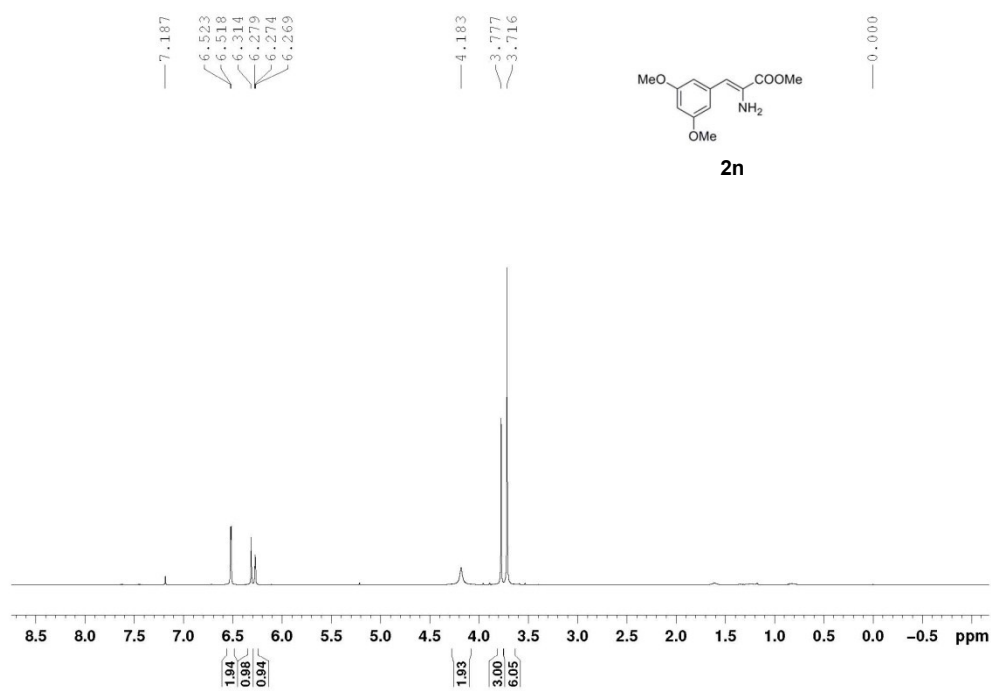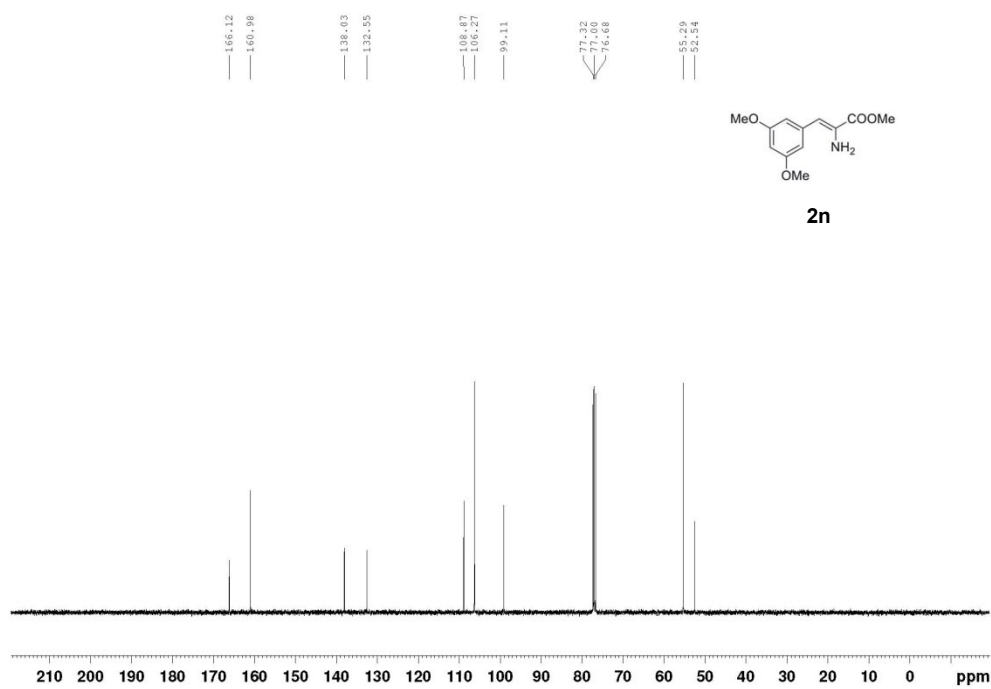

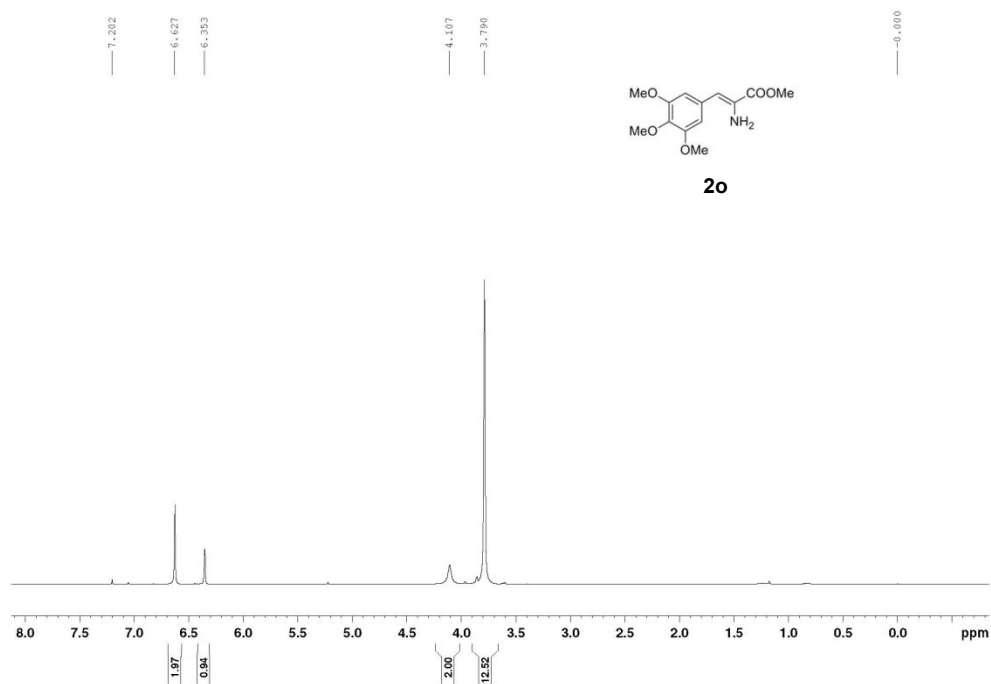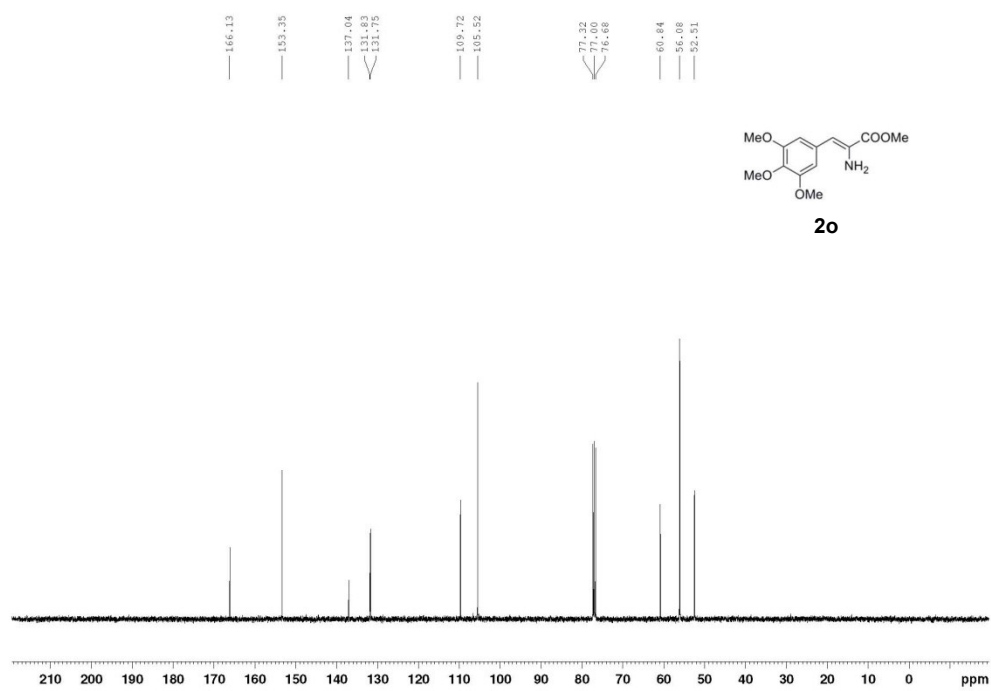



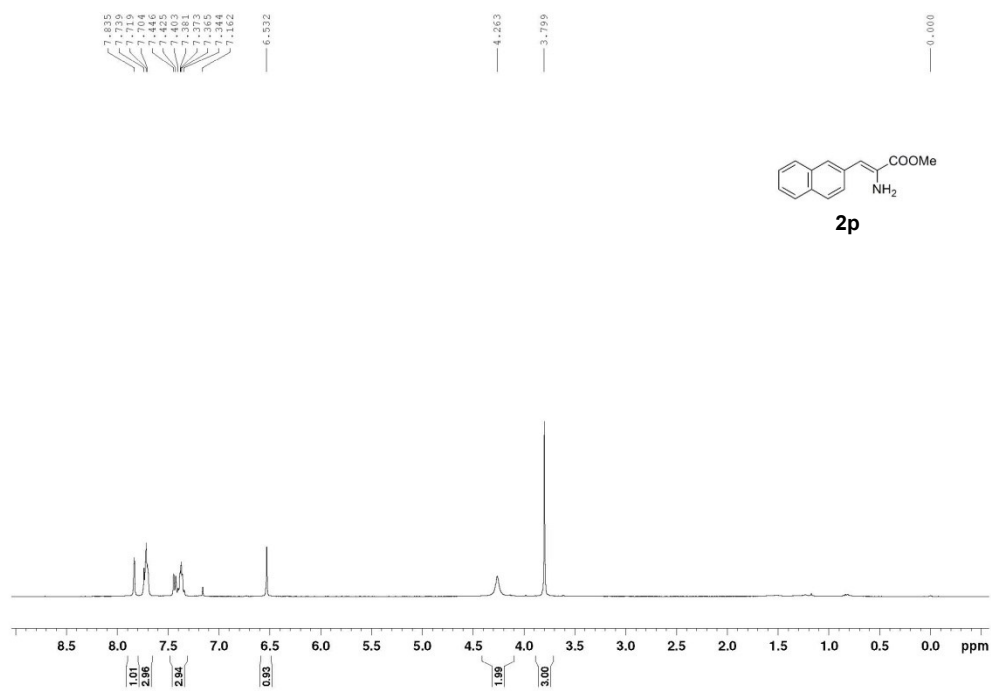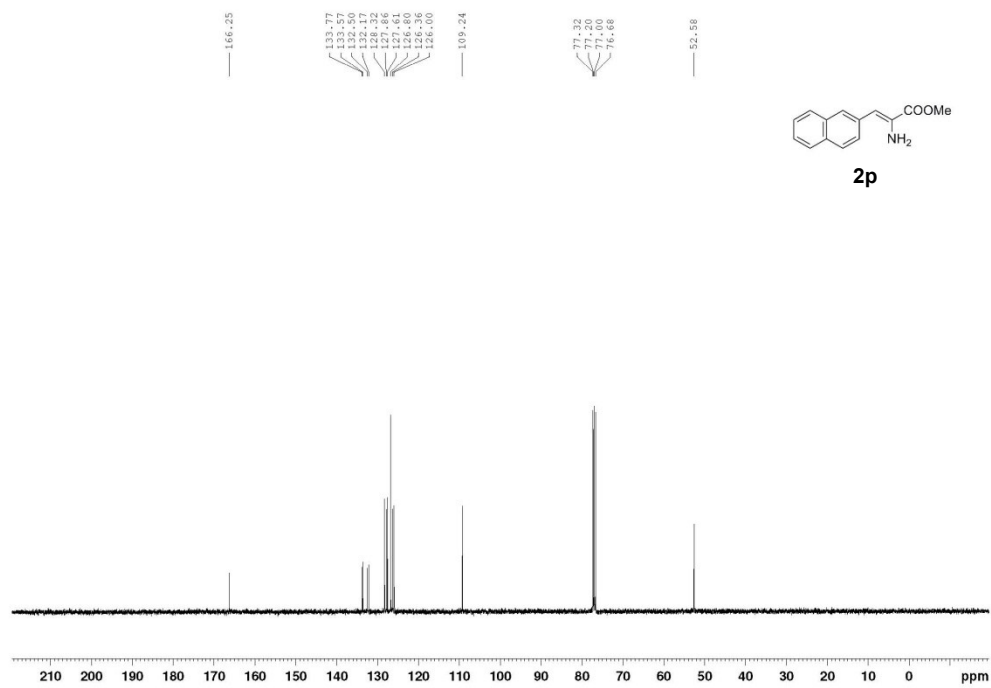

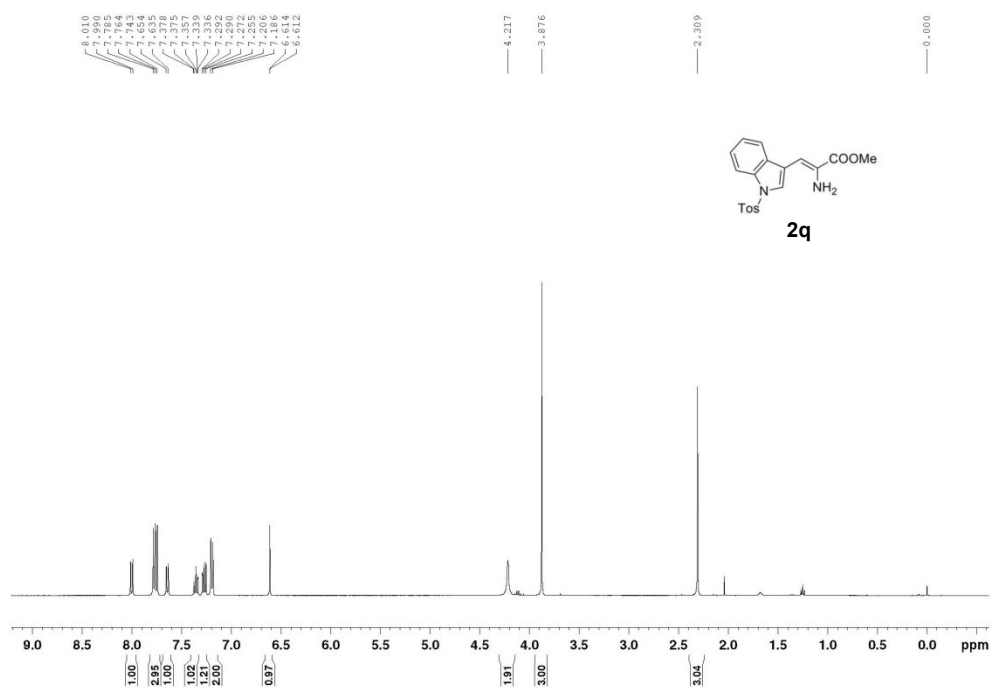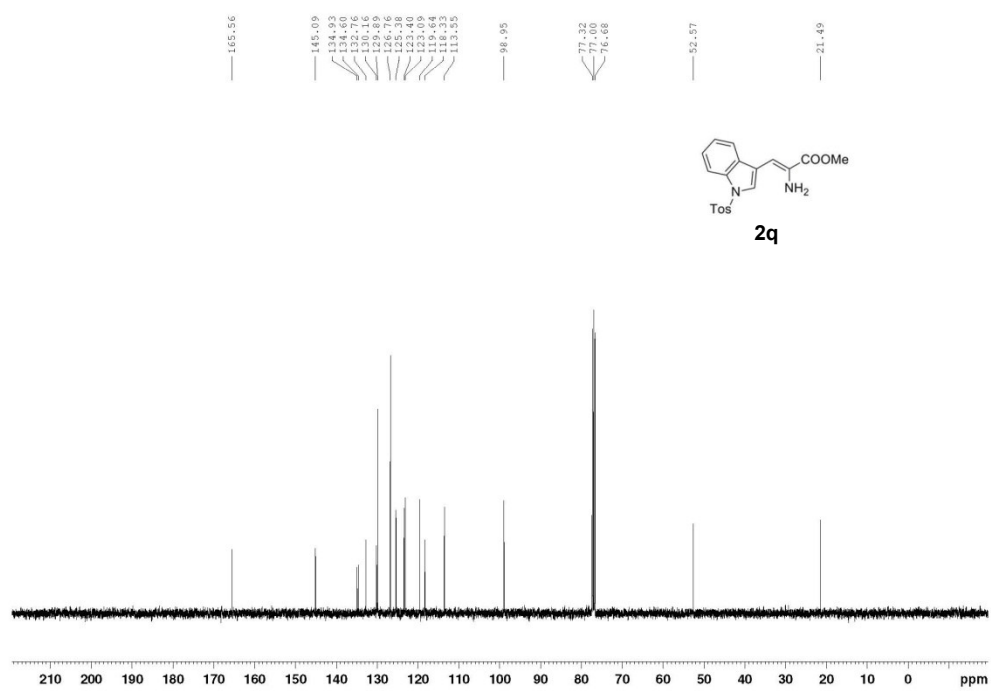

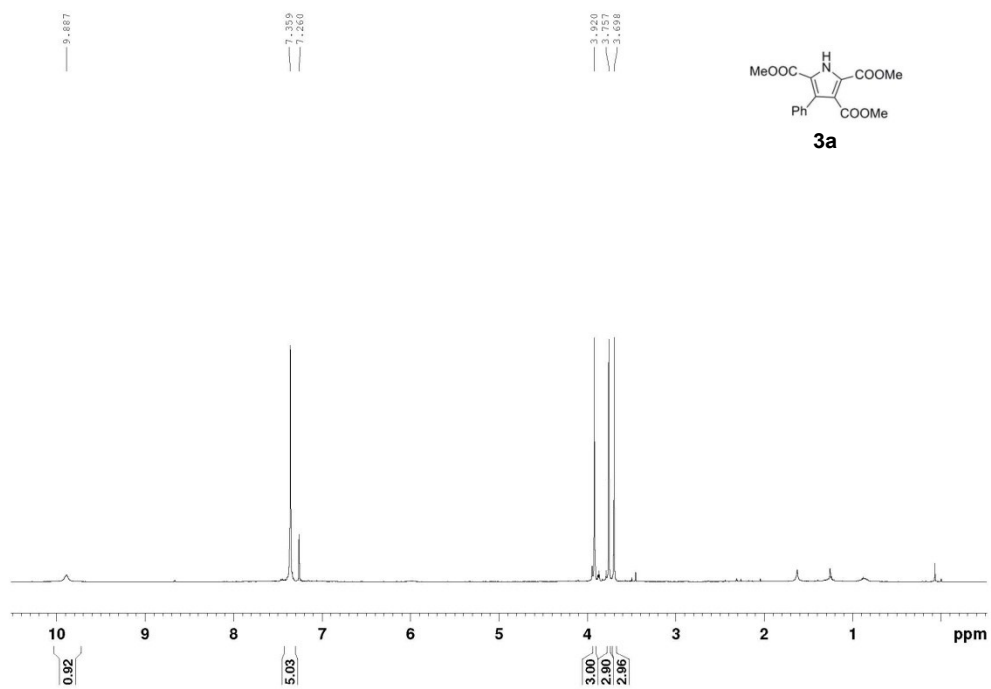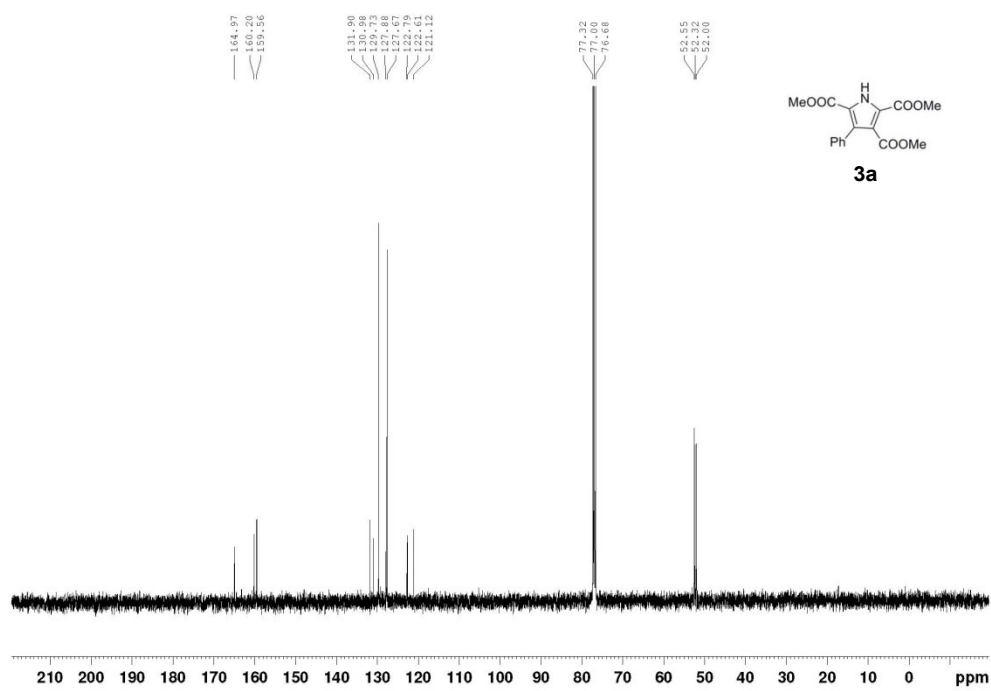

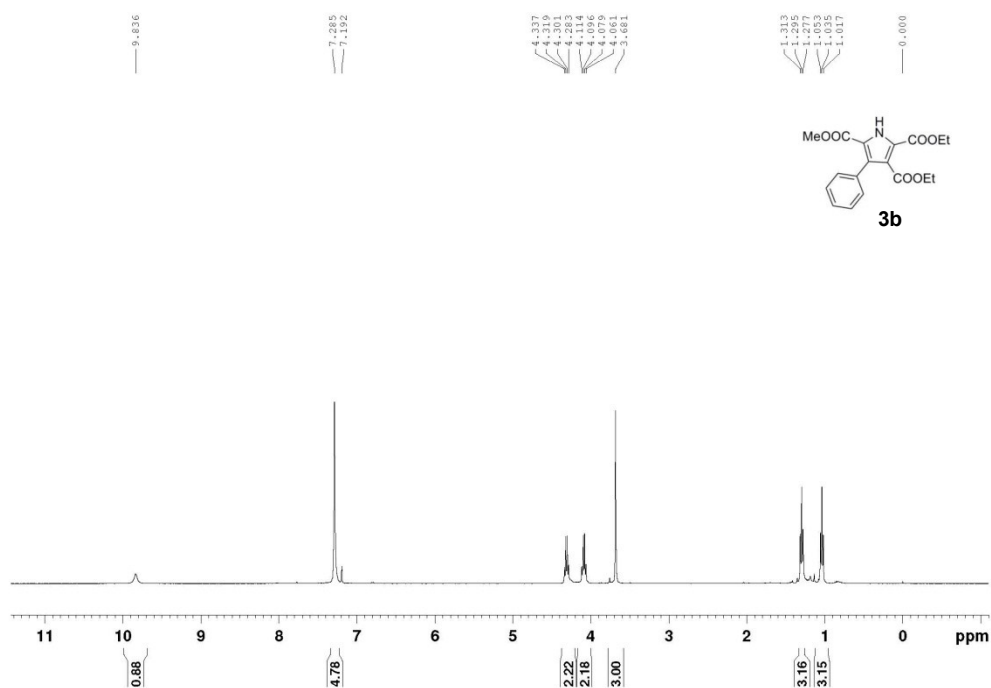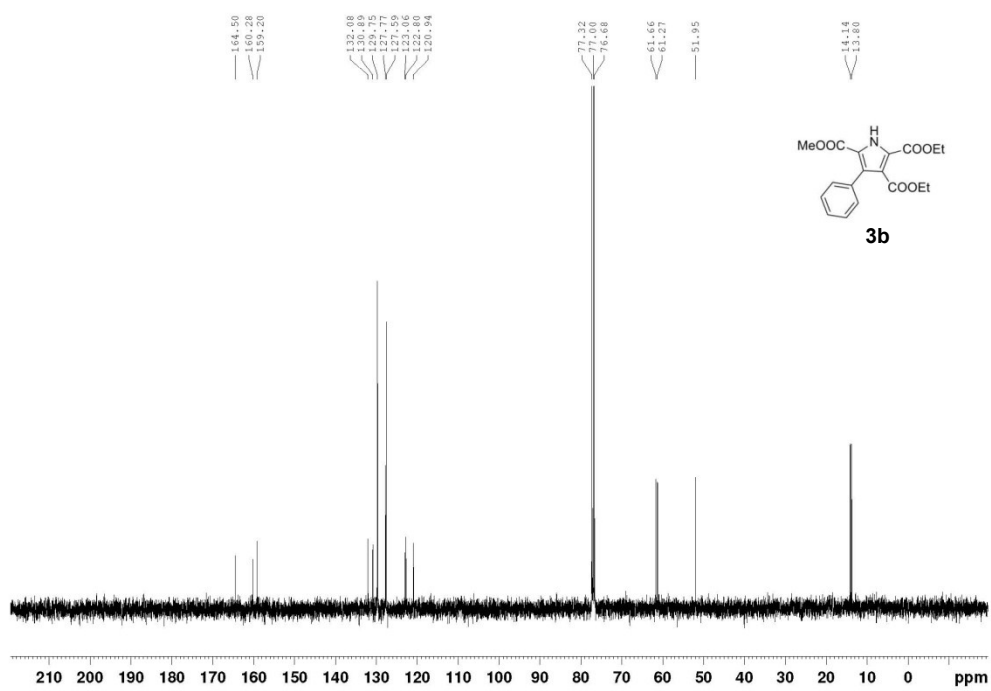

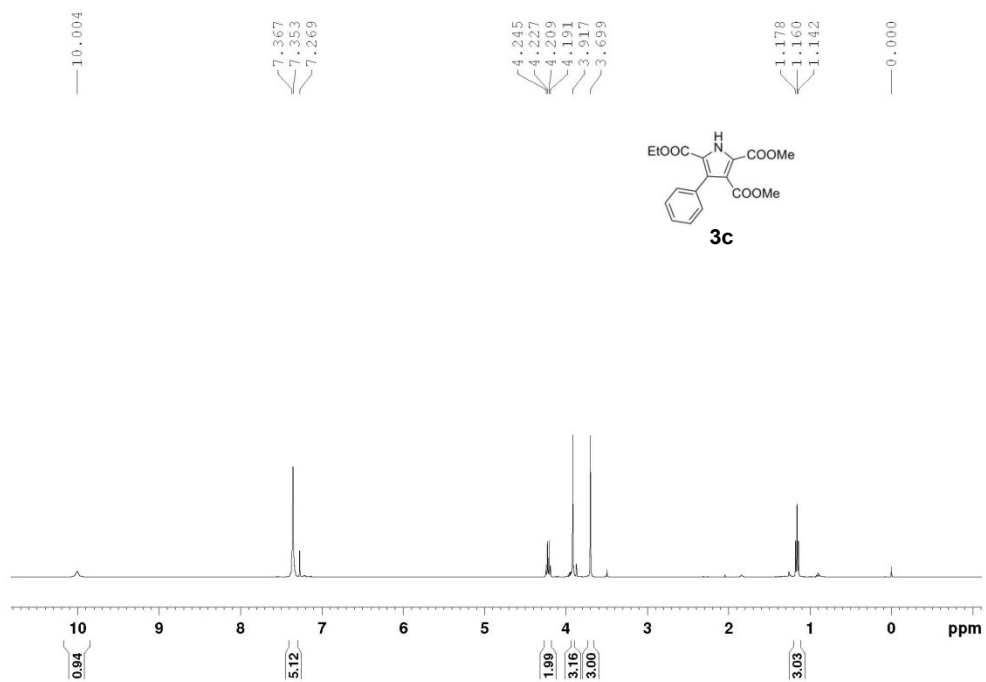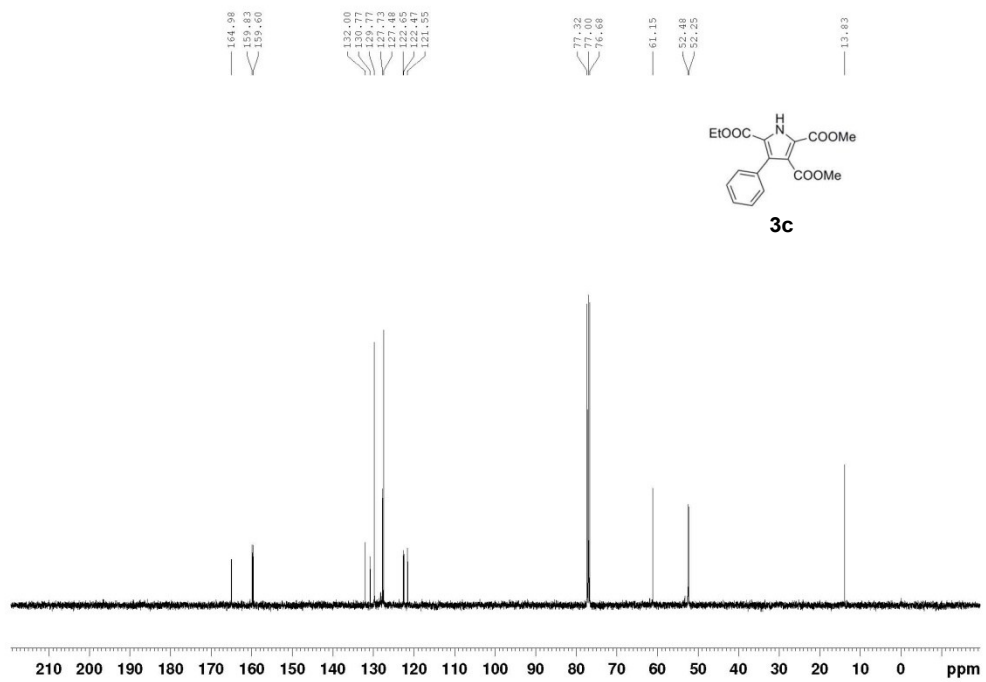

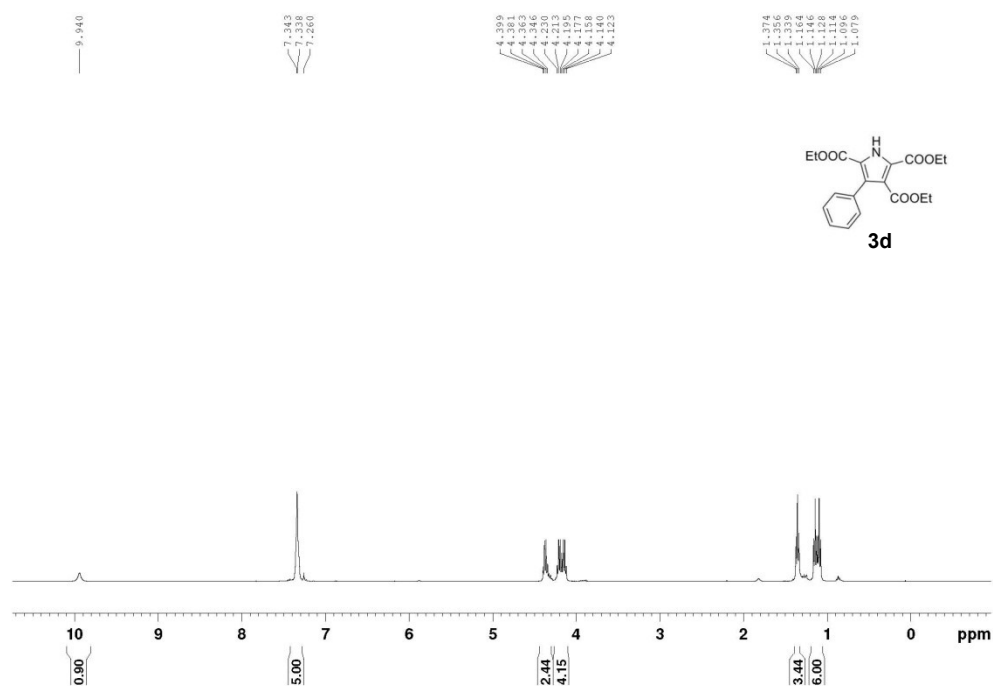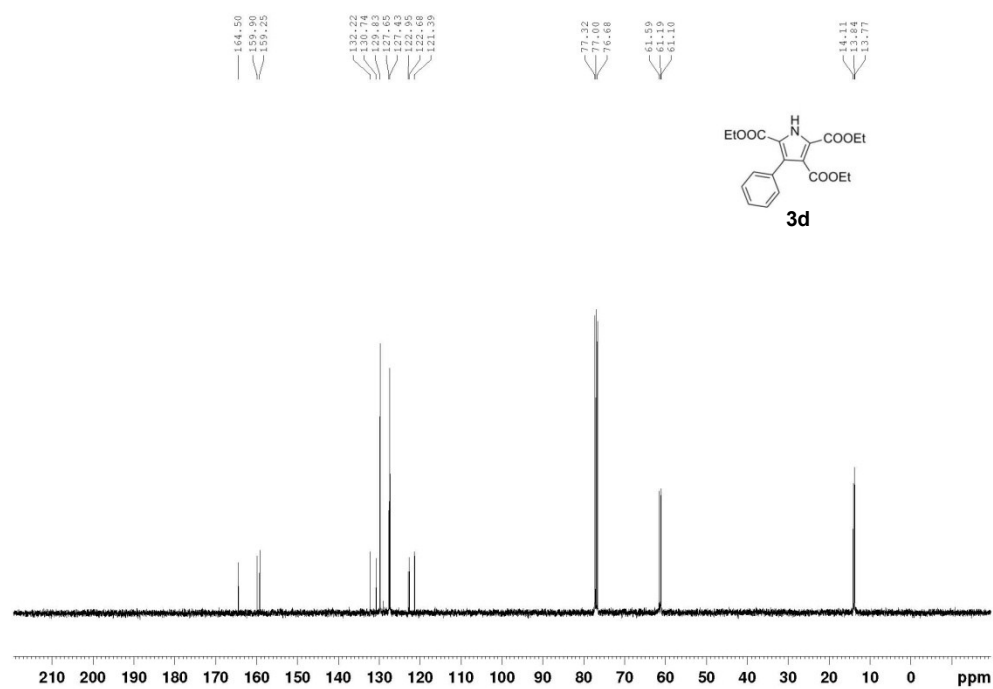

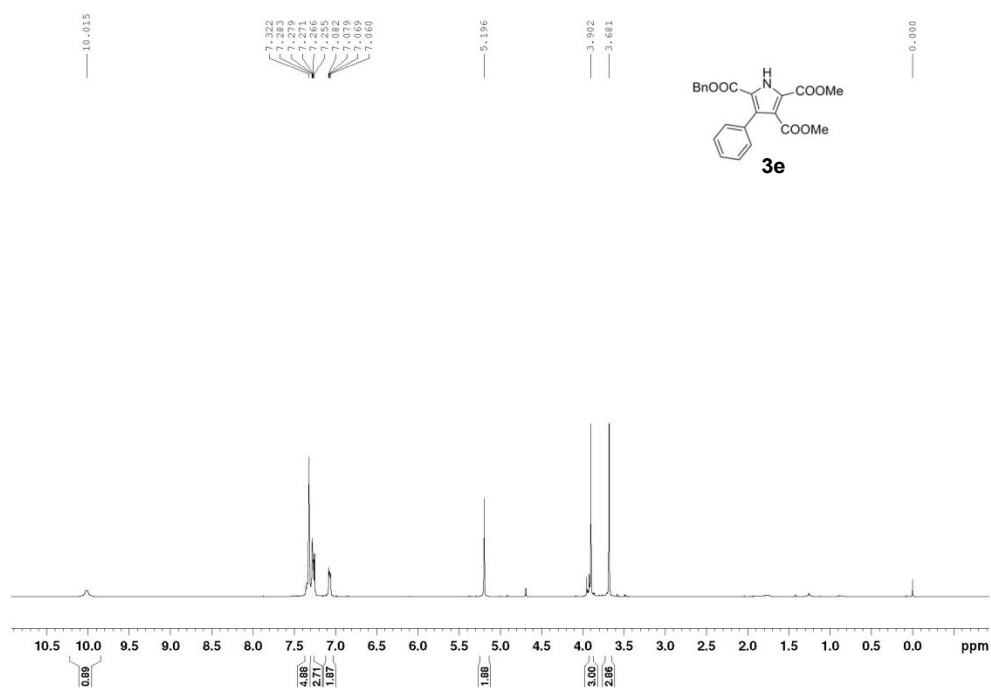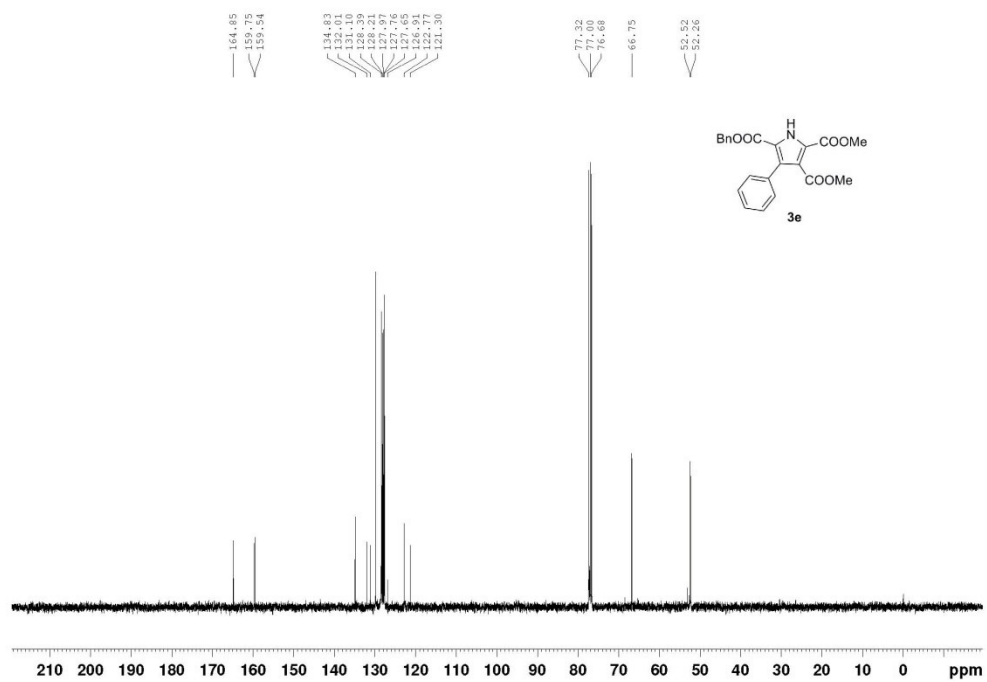

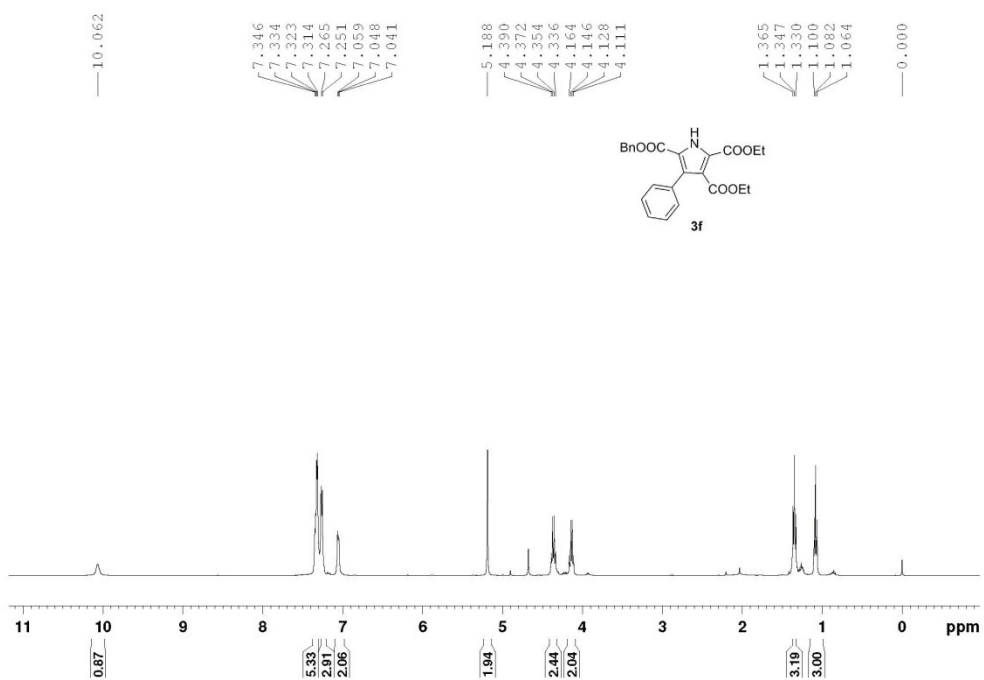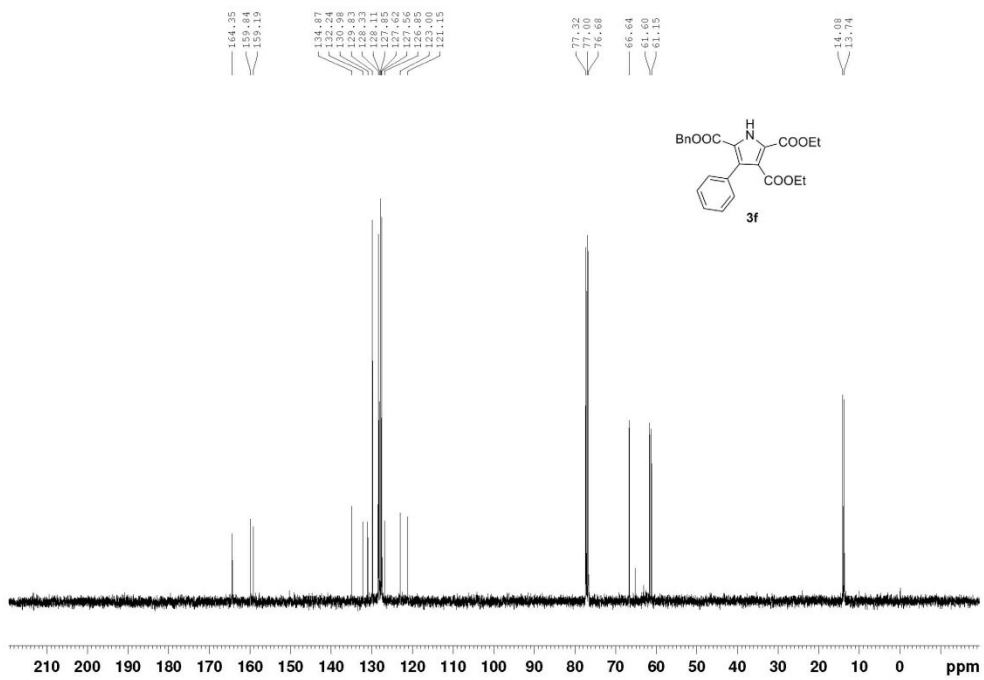



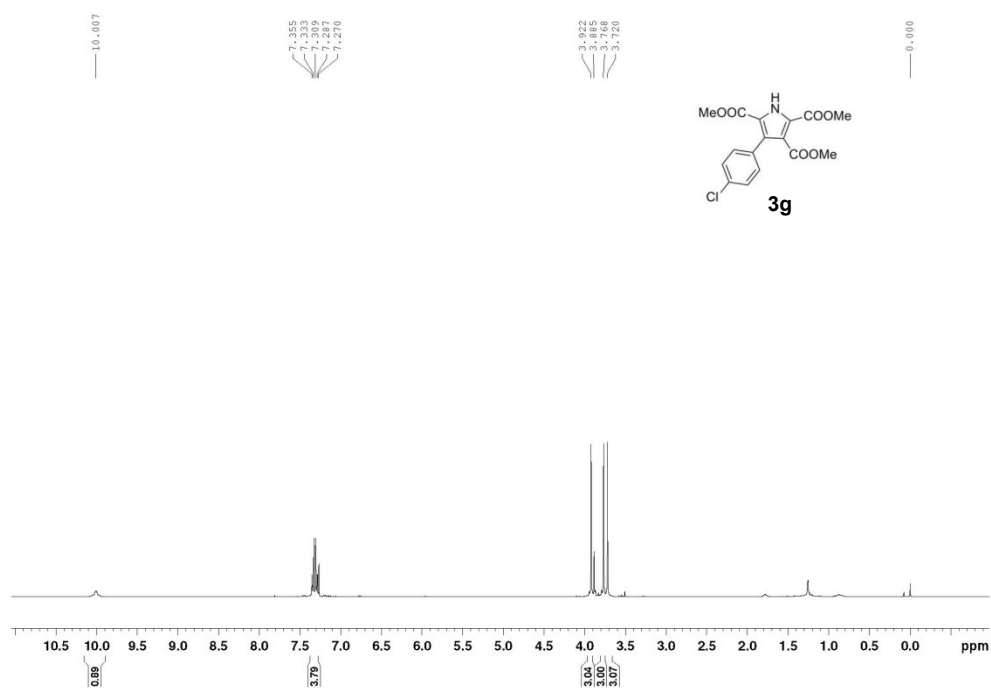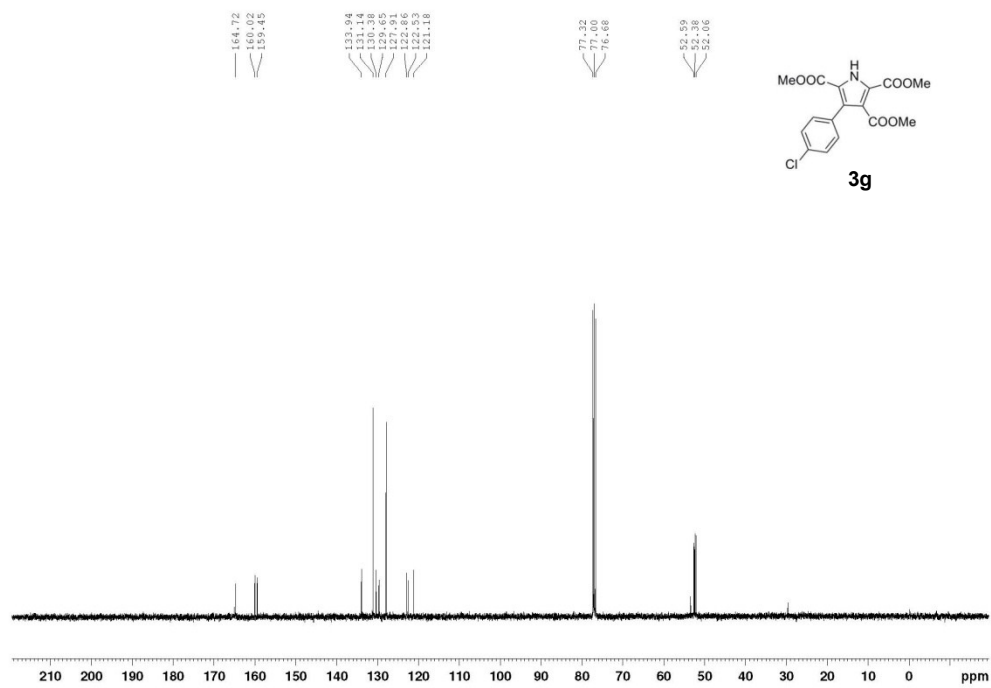

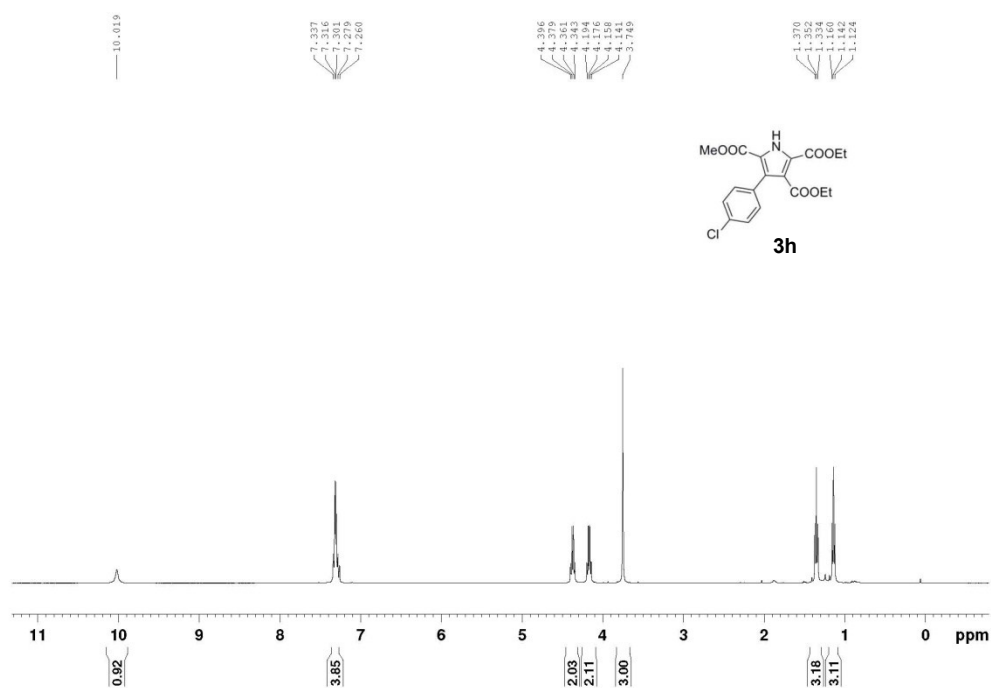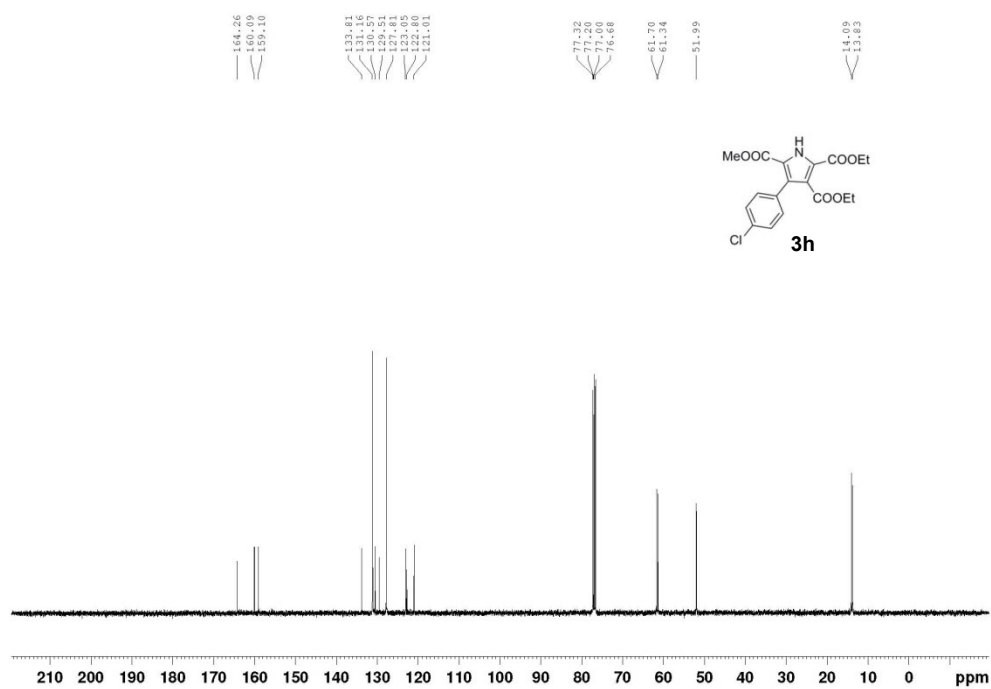

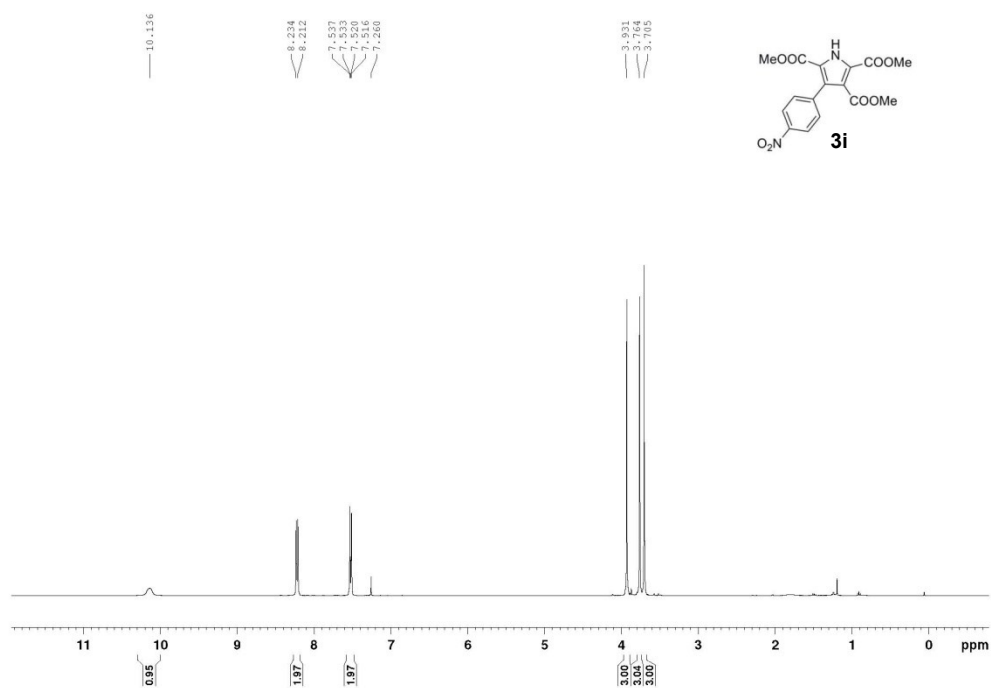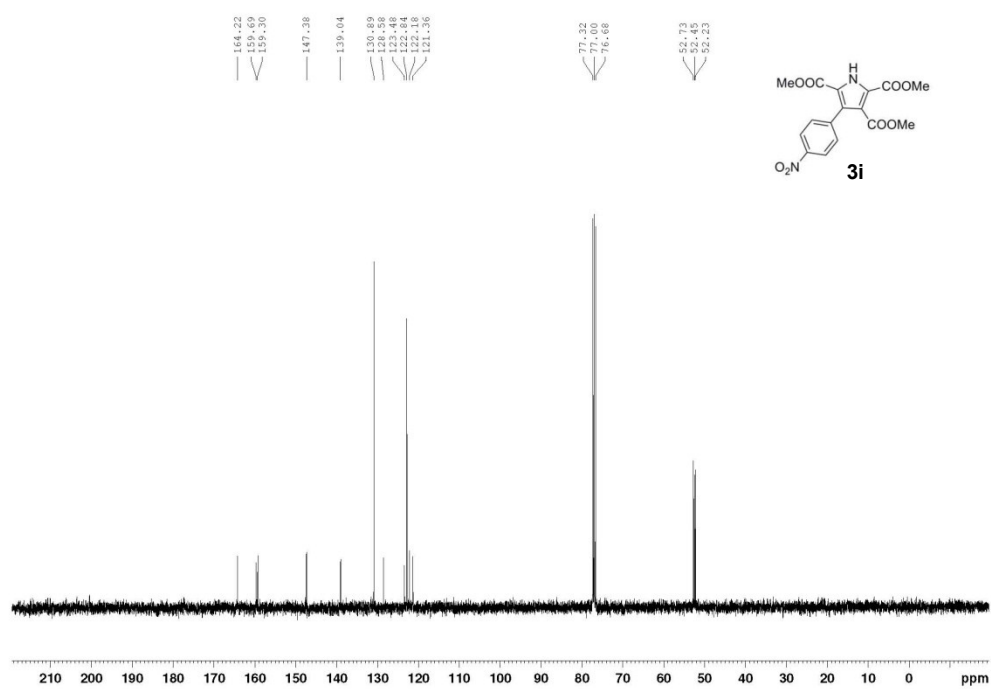

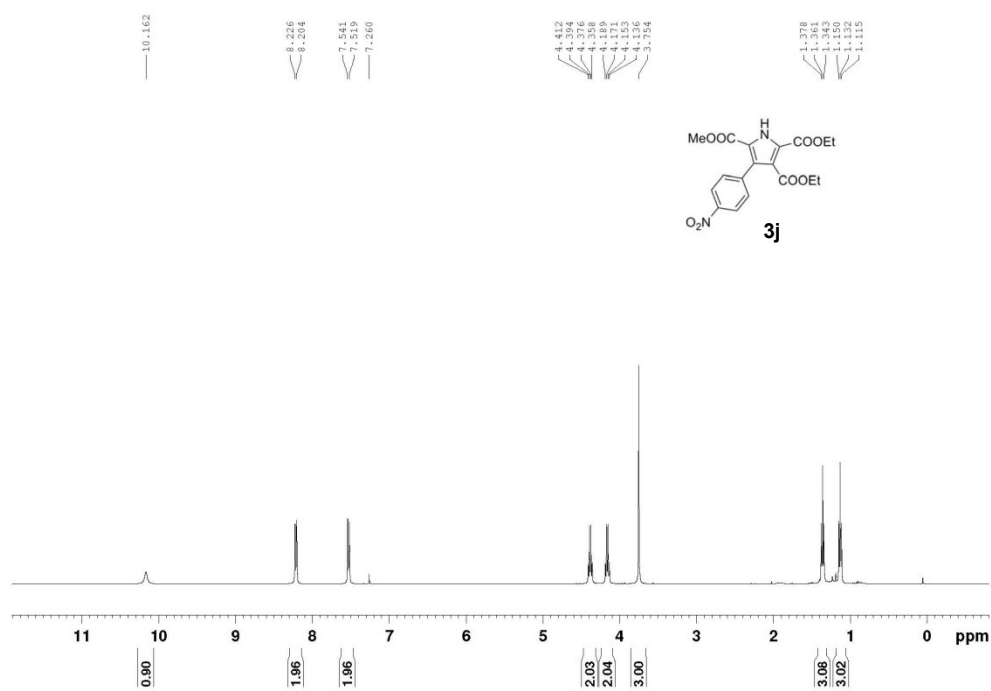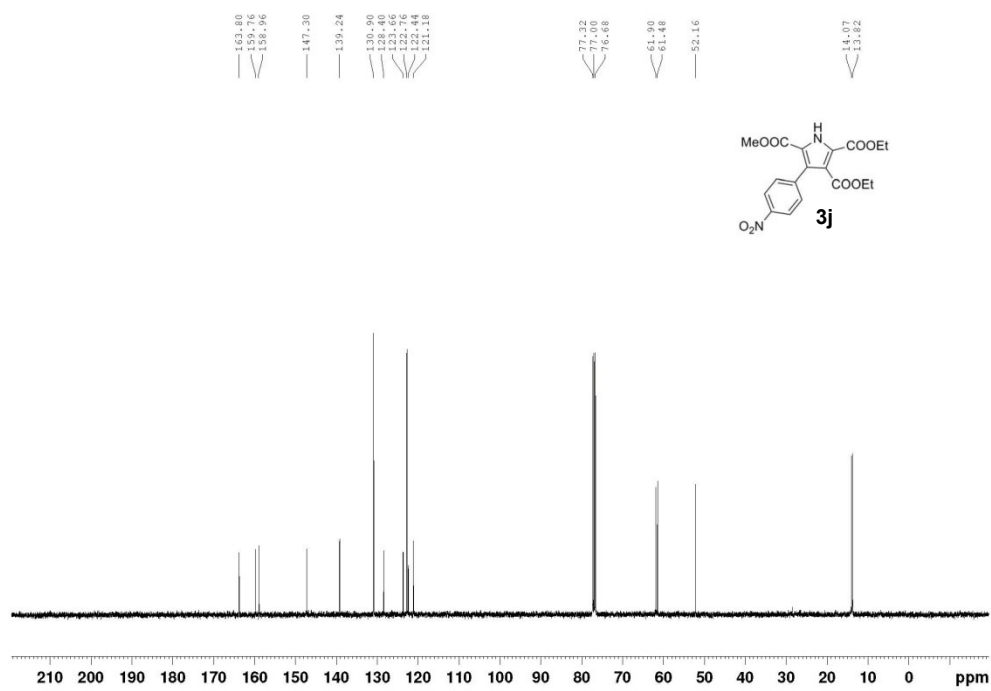

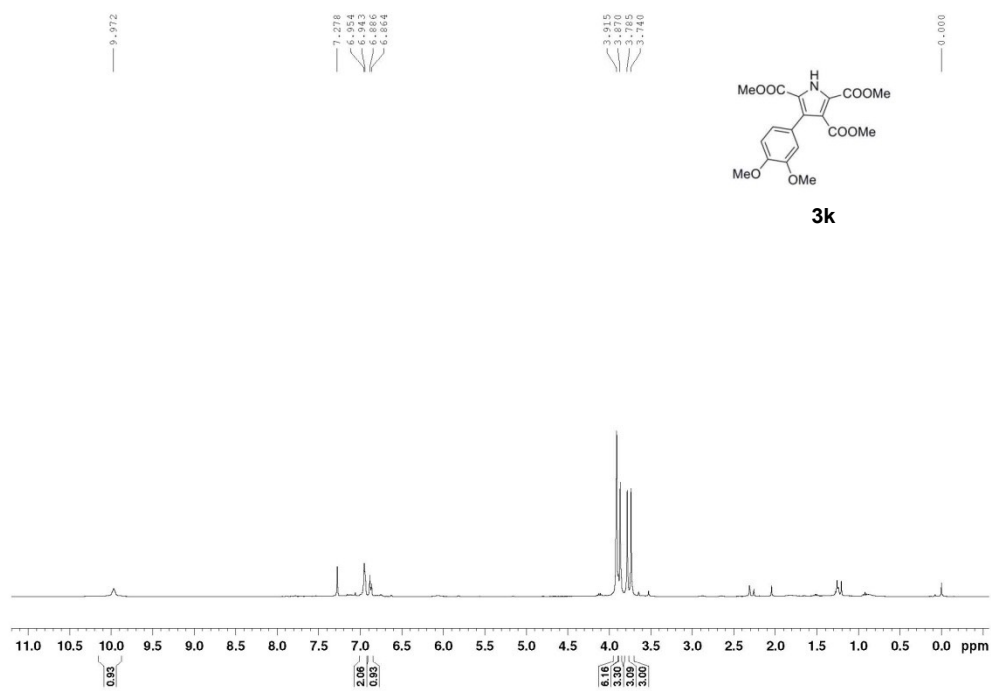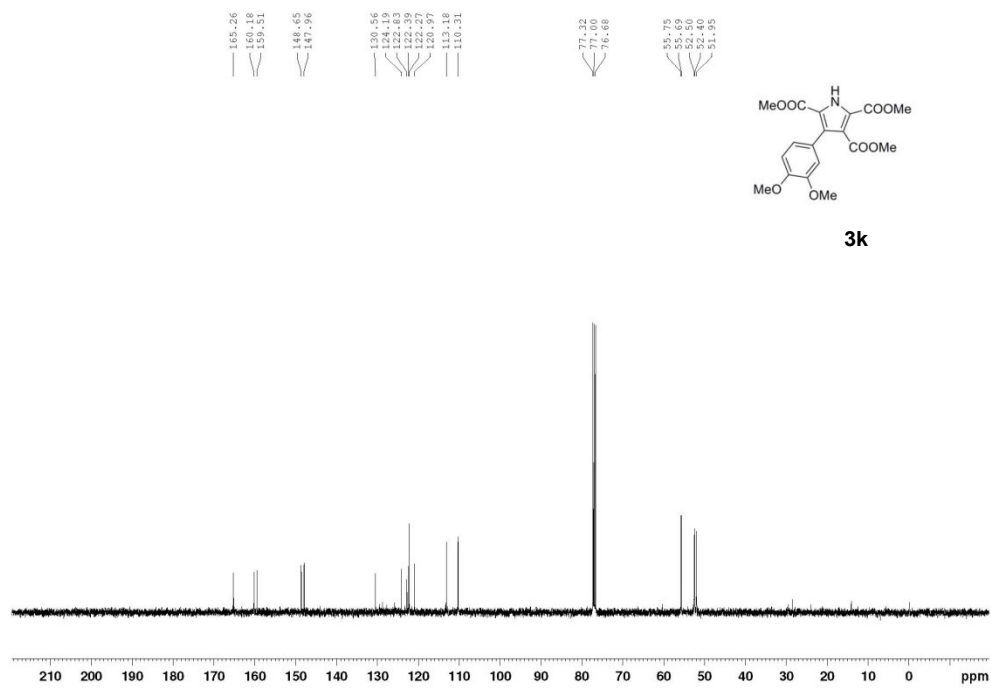

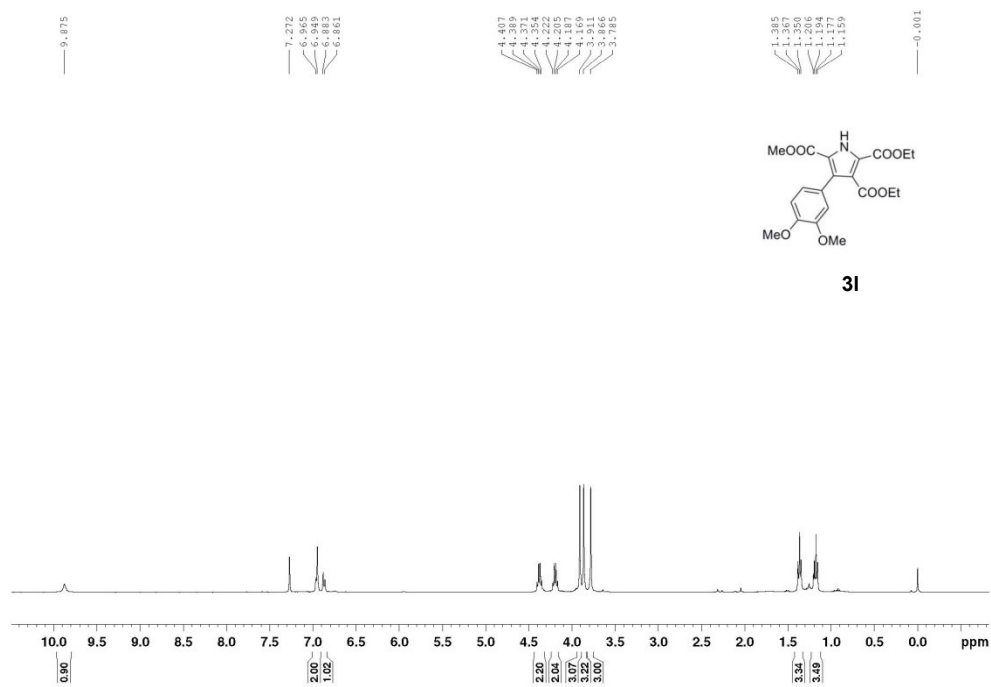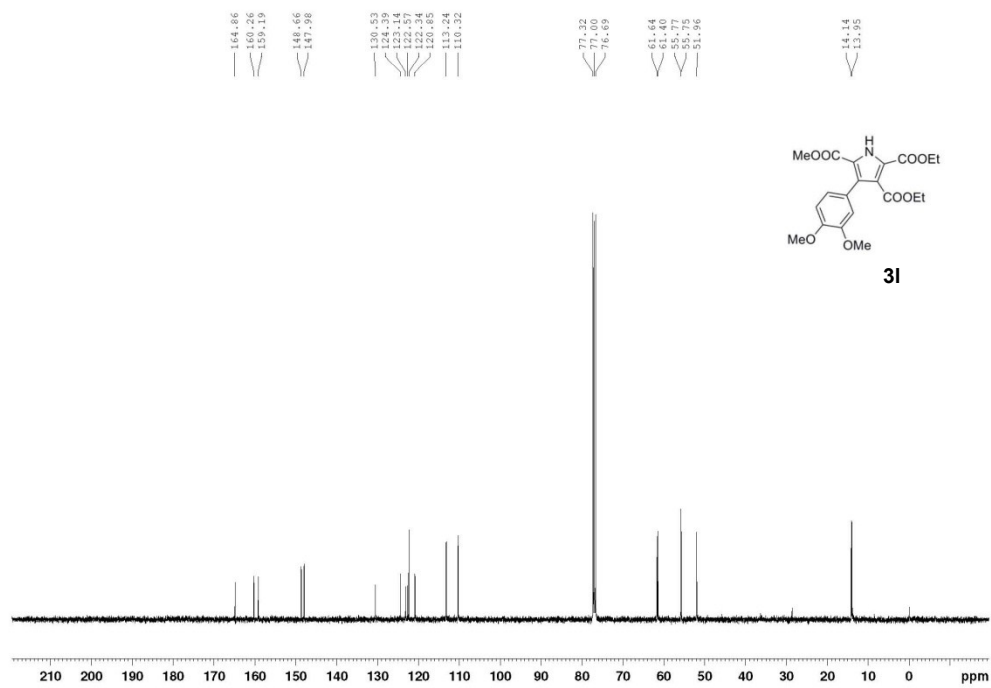

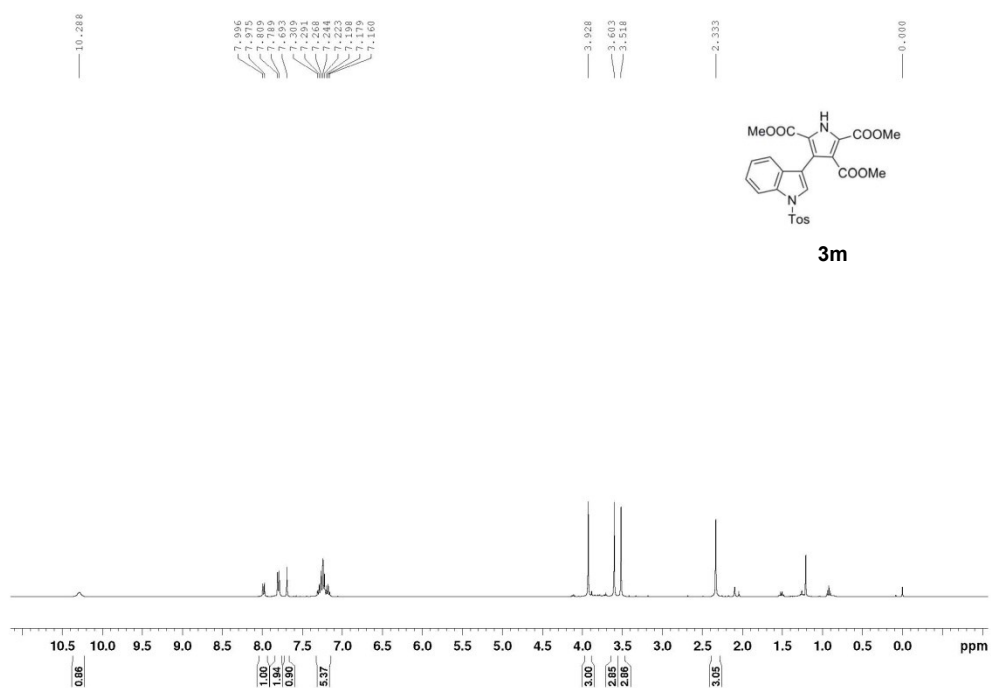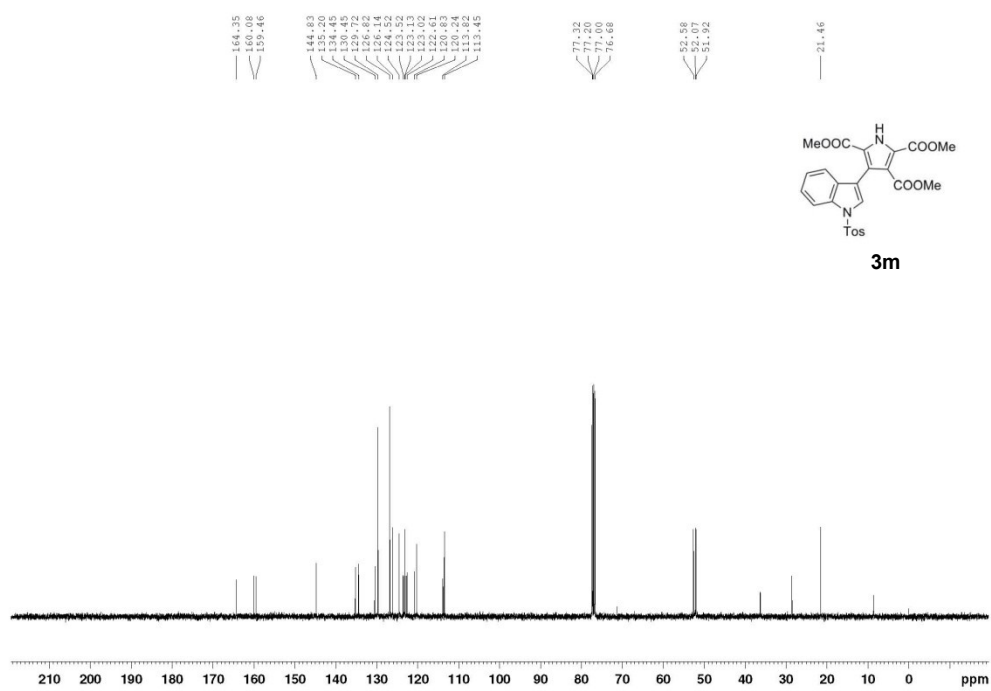

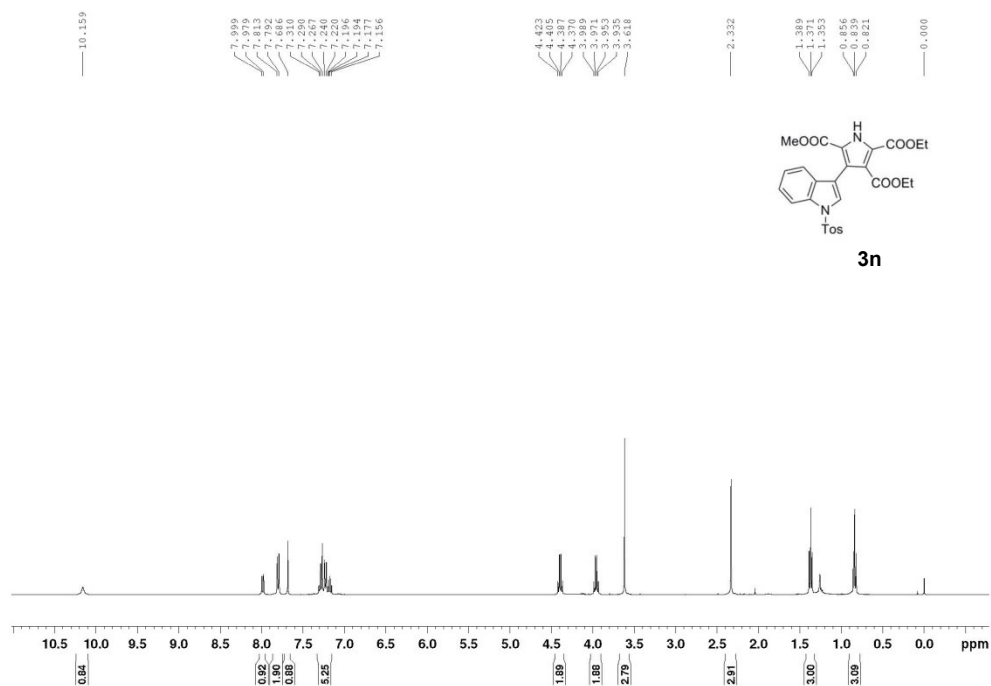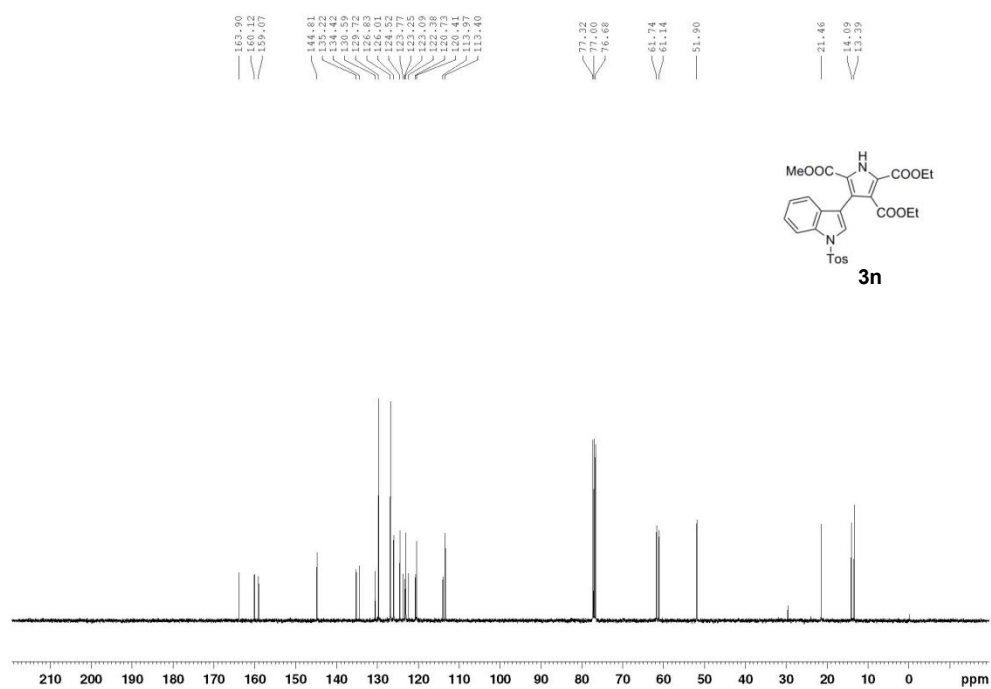



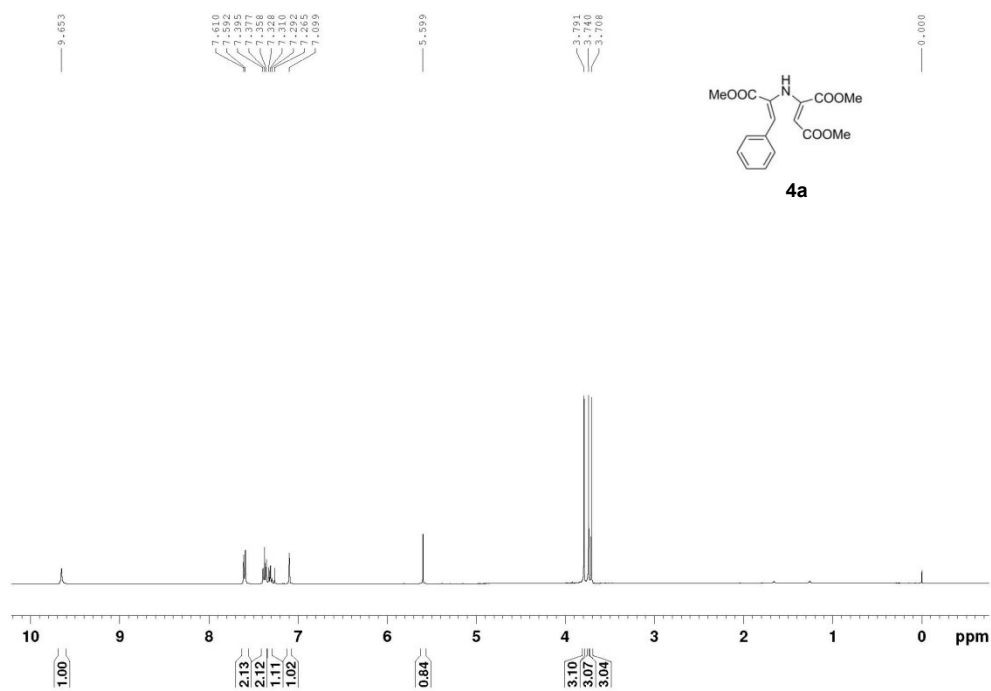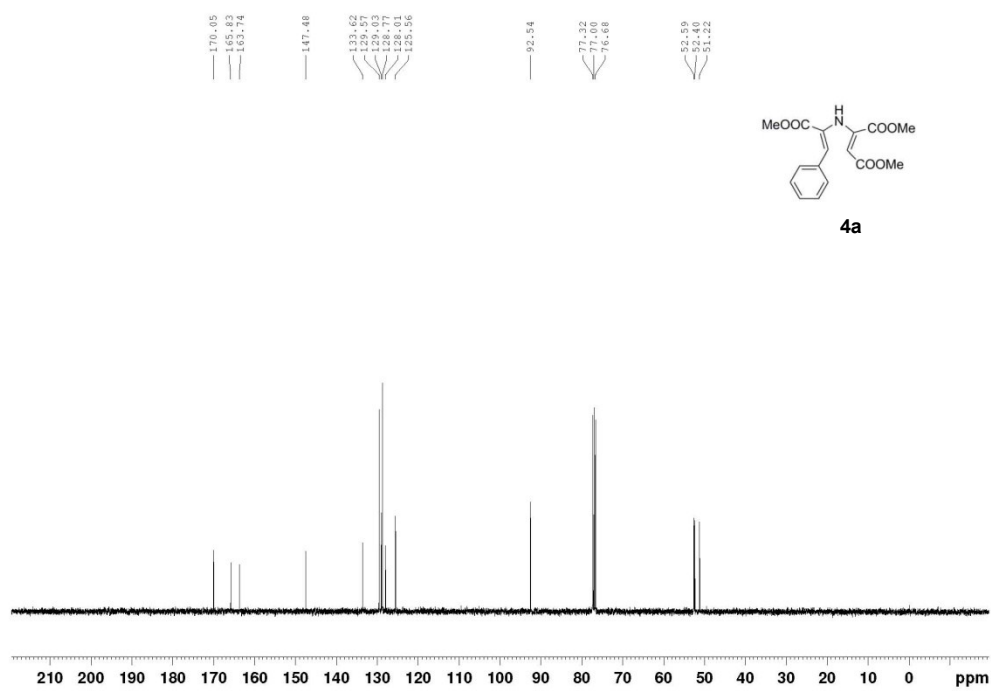

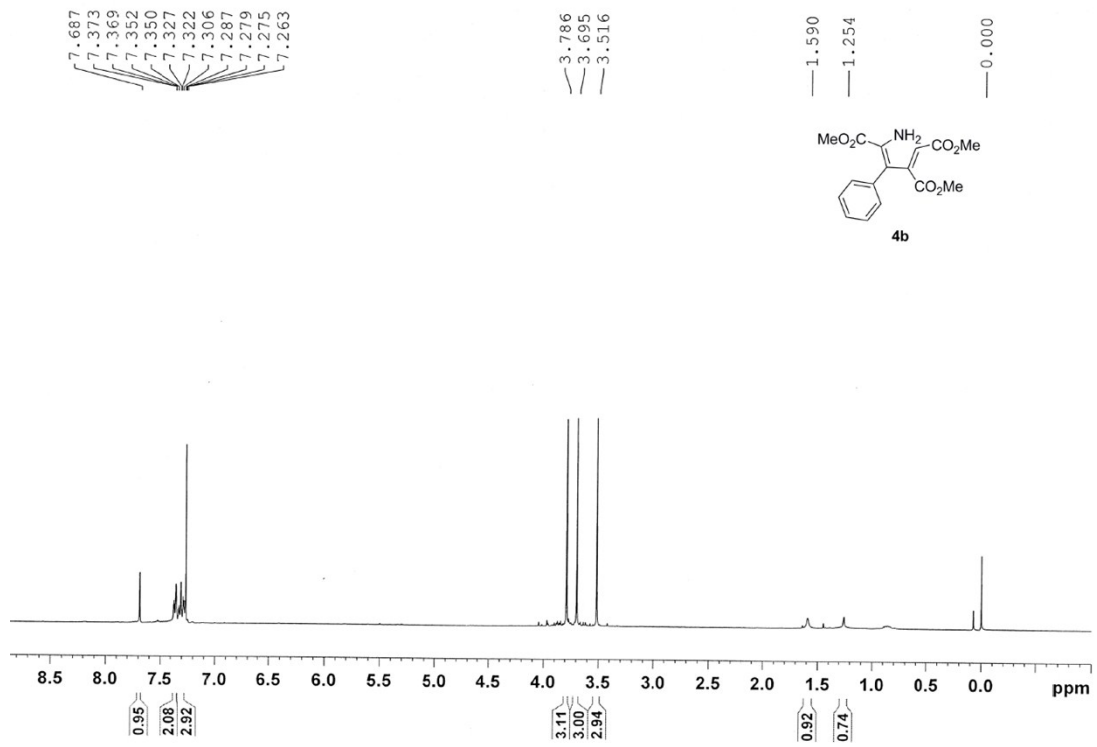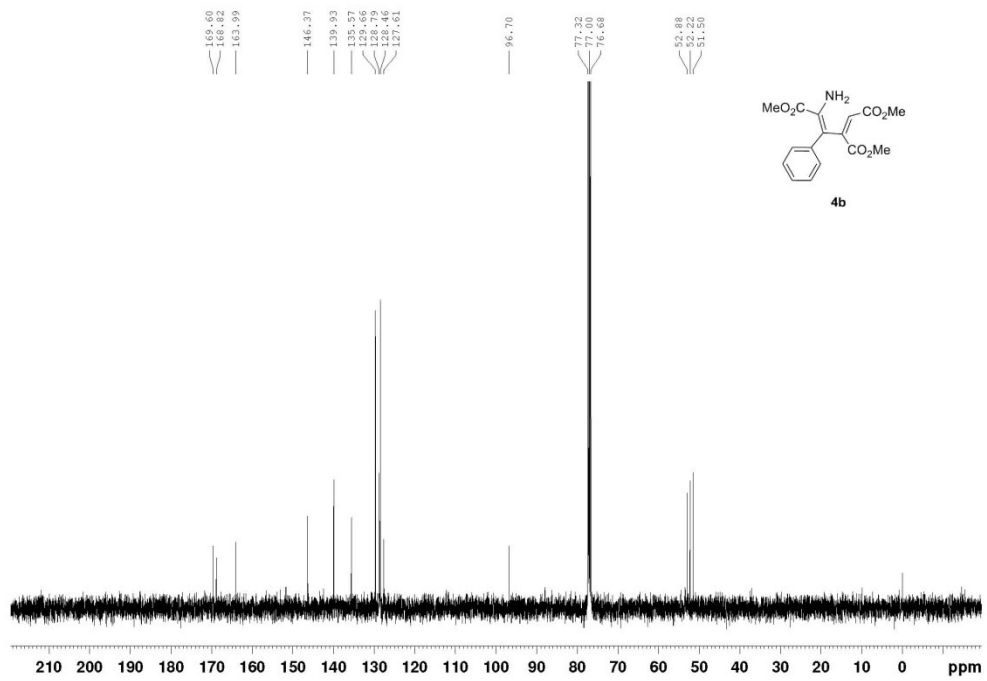

Supplement: c5qo00182j1.pdf [file c5qo00182j1.pdf]
